# Supplementary material
Source: Elsevier journal article supplement (https://lshtm-eprints-repo-prod.lshtm-eprints.cdl.cosector.com/1990/1/mmc1.pdf)
Supplement: mmc1 [file mmc1.pdf]

# THE LANCET

## **Supplementary webappendix**

This webappendix formed part of the original submission and has been peer reviewed. We post it as supplied by the authors.

Supplement to: The Emerging Risk Factors Collaboration. Diabetes mellitus, fasting blood glucose concentration, and risk of vascular disease: a collaborative meta-analysis of 102 prospective studies. *Lancet* 2010; **375**: 2215–2222.

## Web Extra Material

### **Diabetes mellitus, fasting glucose, and risk of vascular disease: a collaborative meta-analysis of 102 prospective studies**

The Emerging Risk Factors Collaboration

15 June, 2010

Correspondence: Emerging Risk Factors Collaboration Coordinating Centre  
Department of Public Health and Primary Care  
University of Cambridge  
Strangeways Research Laboratory  
Cambridge CB1 8RN  
UK

[erfc@phpc.cam.ac.uk](mailto:erfc@phpc.cam.ac.uk)  
Tel: +44 1223 741 302

eFigure 1

Flow diagram showing steps involved in study selection for the current analysis.

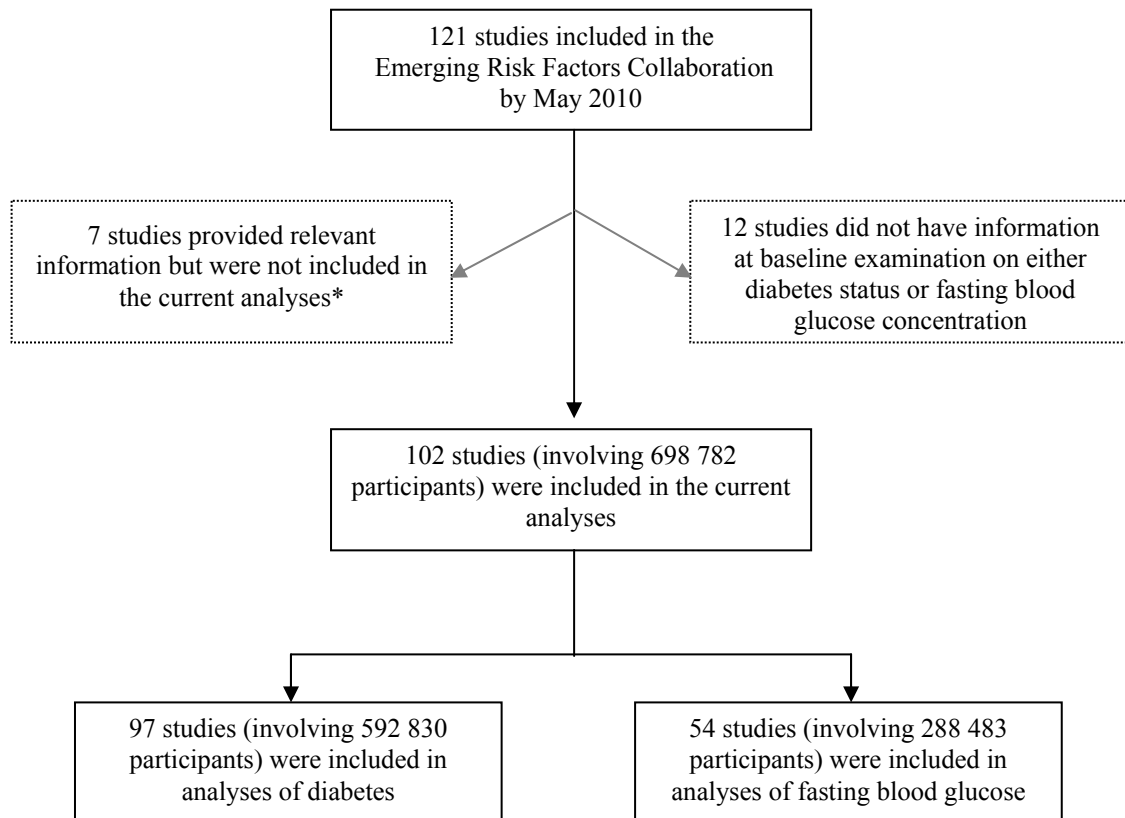

To be eligible for inclusion in the Emerging Risk Factors Collaboration (ERFC), prospective studies (reported variously as observational cohort studies, trials, or analyses of nested case-control or case-cohort subsets) had: (1) data available from baseline measurements of at least one of the relevant markers assessed; (2) at least 1 year of follow-up; (3) participants not selected on the basis of having previous cardiovascular diseases; and (4) information on cause-specific mortality and/or major cardiovascular morbidity collected during follow-up. Studies were prioritized for inclusion if they were known to have recorded at least 20 000 person years at risk. Most eligible studies were identified in previously published meta-analyses, with additional studies identified through updated computer-assisted literature searches of databases, scanning of reference lists, hand-searching of relevant journals and correspondence with authors of relevant reports. Further details of the ERFC (including search strategies, contributing studies, data provision and management, and other characteristics) have been reported previously (*Eur J Epidemiol.* 2007;22:839-869).

\* None of the participants in GLOSTRUP and USPHS2 had a history of diabetes at baseline, and fasting glucose information was not provided. All of the participants with relevant information in NORTH KARELIA and PREVEND had a history of diabetes, and fasting glucose information was not provided. Data from EAS, LASA and WHI-HaBPS had not been fully harmonised by the ERFC coordinating centre at the time analyses were conducted.

**Figure 2** Prevalence of diabetes at the initial survey in 592 830 participants in 97 studies

**A Age-adjusted prevalence of diabetes, by sex**

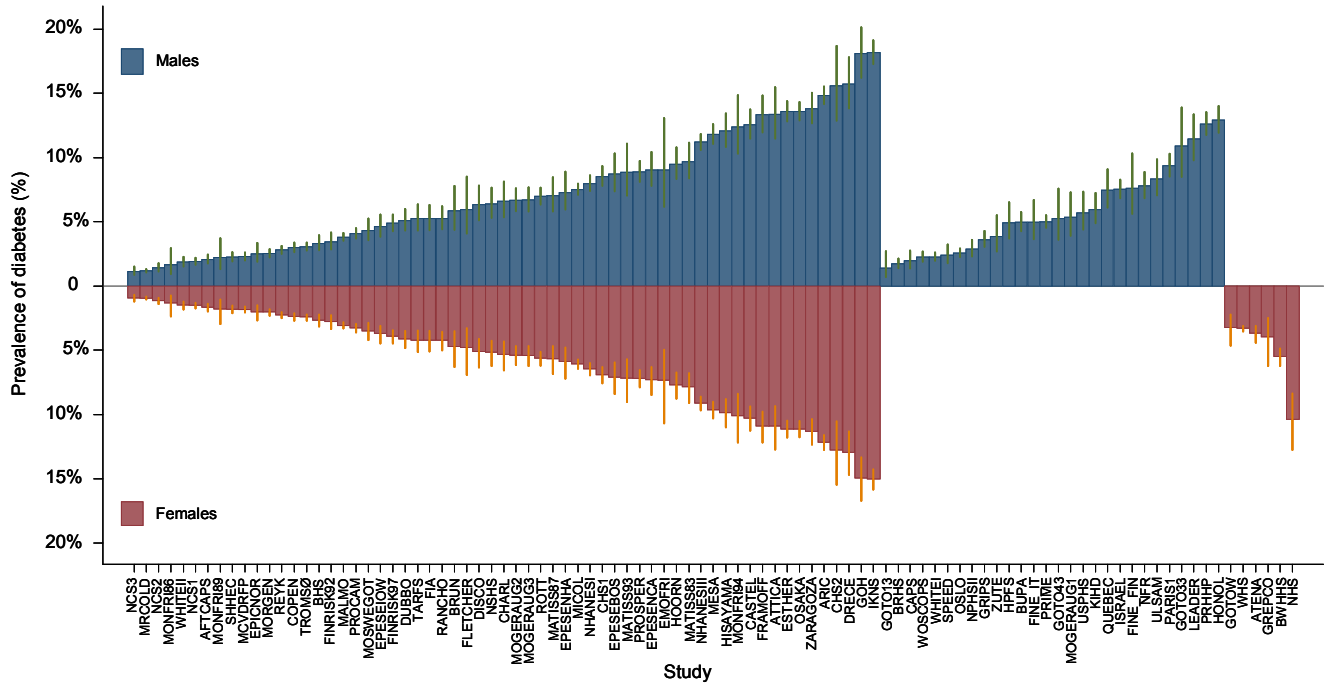

**B Age- and sex-adjusted prevalence of diabetes, by study-specific definition of history of diabetes**

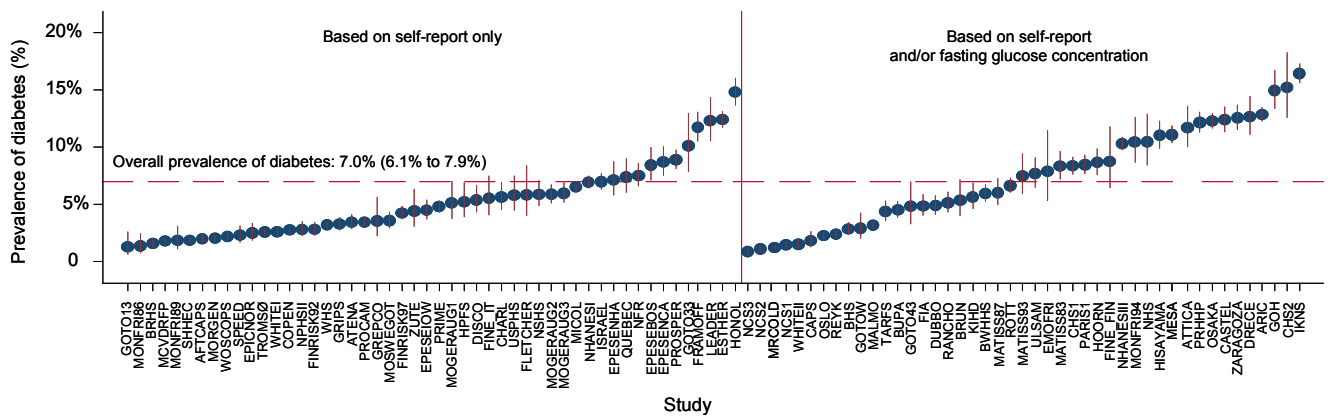

**C Age- and sex-adjusted prevalence of diabetes, by geographical region**

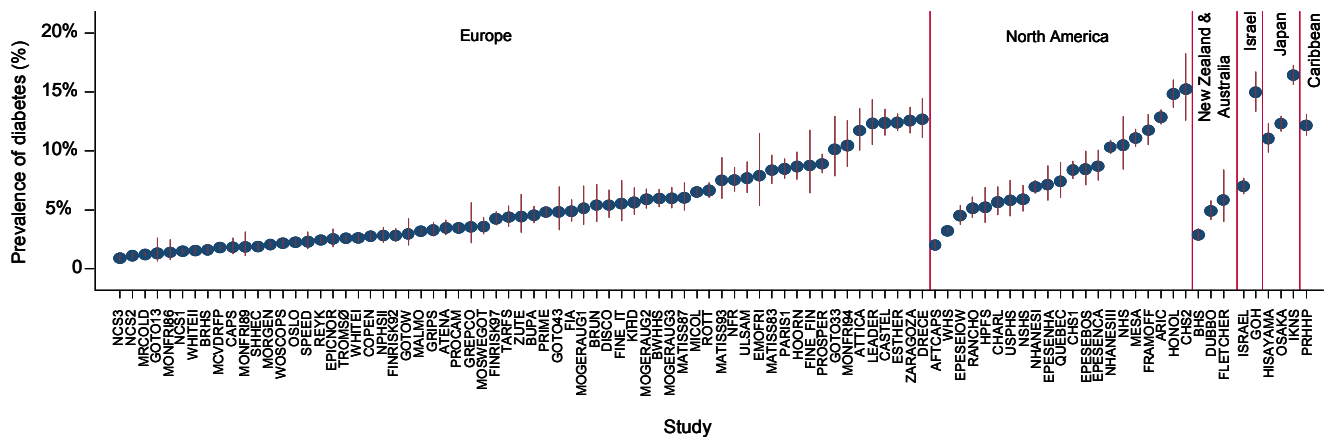

People were classified as having diabetes based on self-report or fasting glucose  $\geq 7$  mmol/L. Prevalence was adjusted to age 60. Two studies (ALLHAT and SHS) with adjusted prevalence of diabetes higher than 20% are not presented in this figure.

eFigure 3 Mean fasting glucose concentration at baseline by type of blood sample

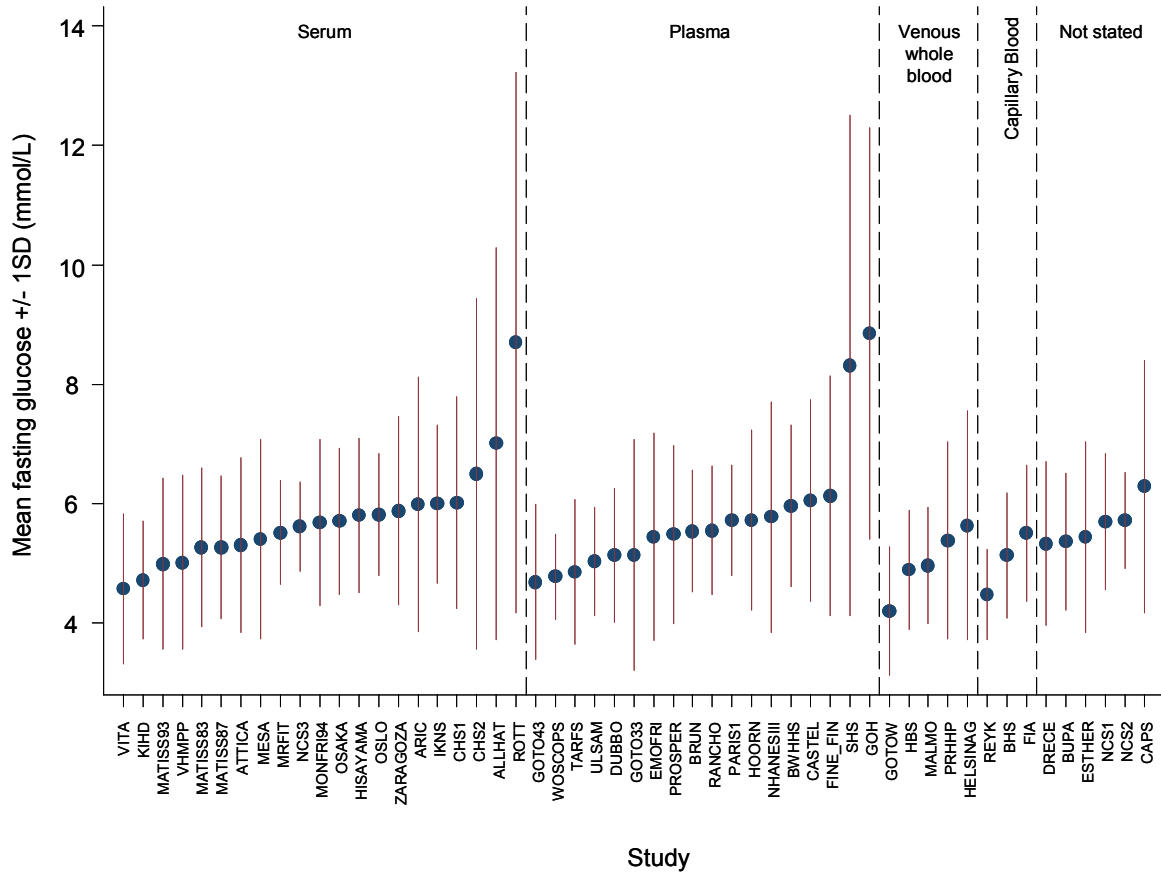

**eFigure 4 Cross-sectional correlates of fasting glucose concentration in people without known diabetes at baseline**

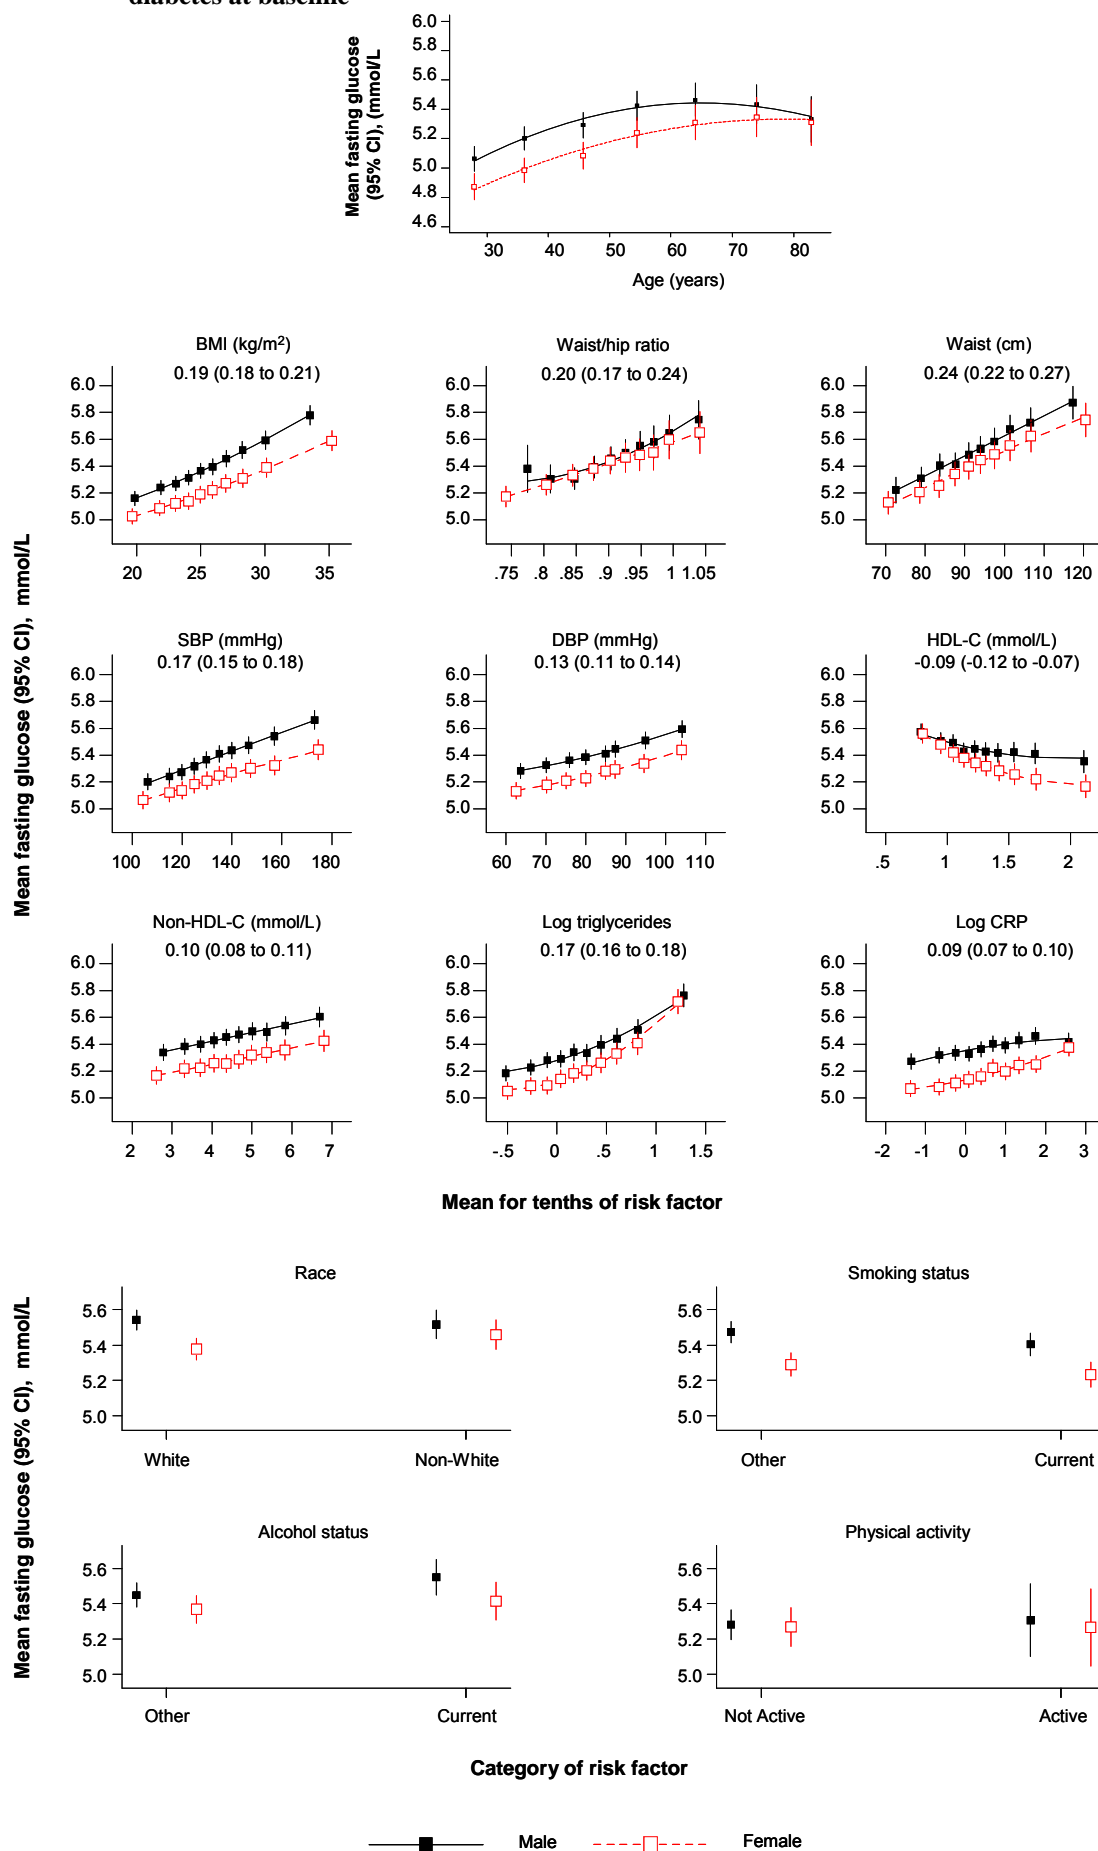

For all correlates except age, response means are adjusted to age 60. For continuous risk markers, values presented are the Pearson's correlation coefficient (95% CI) for the association between the risk marker and fasting glucose concentration in men and women combined.

**eFigure 5** Age- and sex-adjusted regression dilution ratios for fasting glucose measurements in people without known history of diabetes at baseline

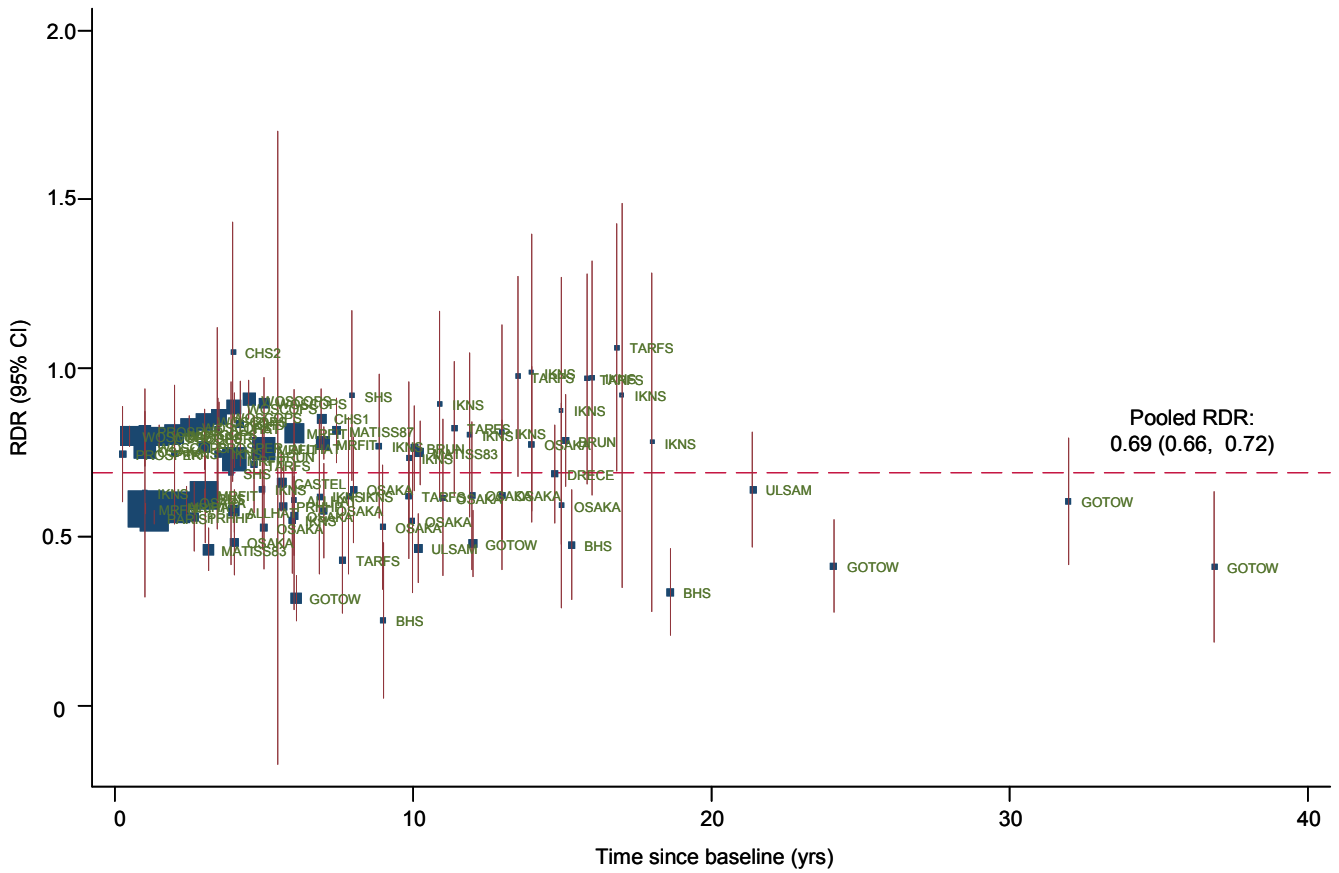

Analyses were based on 201 814 repeat (re-survey) measurements from 65 223 participants with information on fasting glucose concentration from more than one survey. For each re-survey, studies with fewer than 50 participants were excluded. In people with known diabetes at baseline, the pooled RDR was 0.49 (0.44 - 0.54).

**eFigure 6 Hazard ratios for coronary heart disease and ischaemic stroke in people with diabetes at baseline compared with people without diabetes, by additional characteristics**

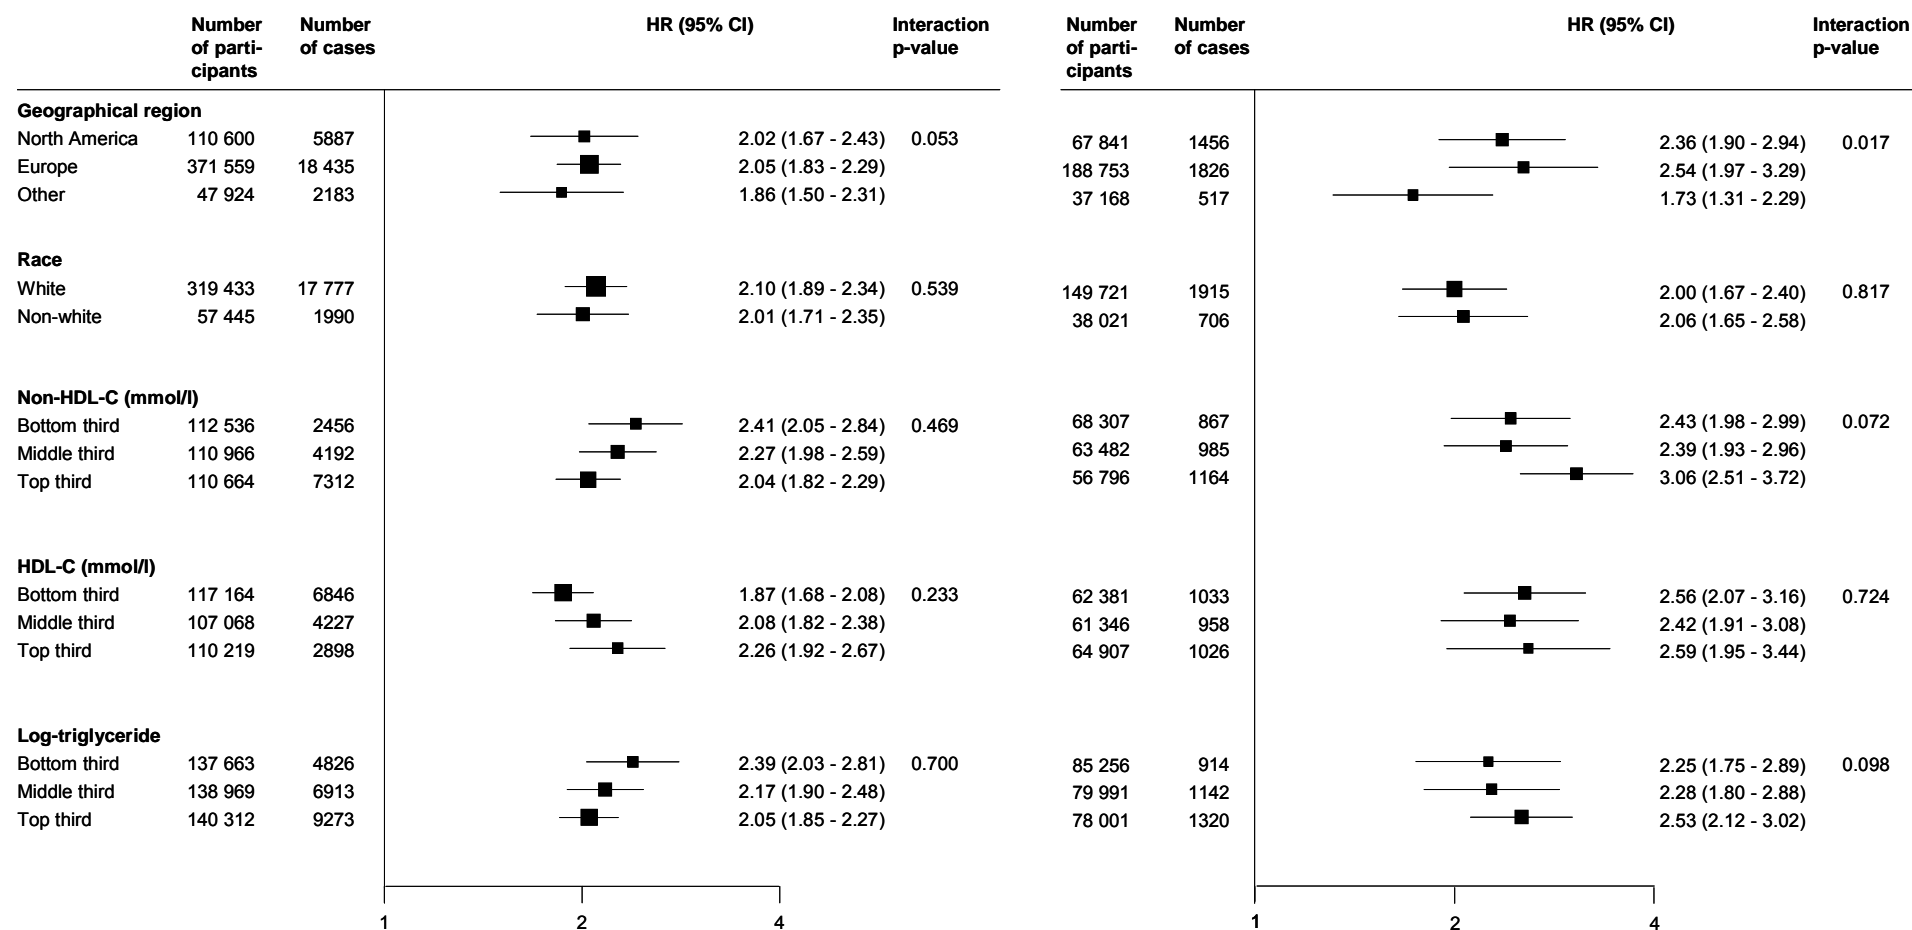

People were classified as having diabetes based on self-report or fasting glucose  $\geq 7$  mmol/L. Regression analyses were stratified, where appropriate, by sex and trial group, and adjusted for age, smoking status, BMI and systolic blood pressure. Studies with fewer than 11 cases of an outcome were excluded from the analysis of that outcome. P-values for interaction were calculated from analyses using continuous variables where appropriate. Sizes of data markers are proportional to the inverse of the variance of the hazard ratios. Non-HDL-C: Bottom, middle and top third defined as  $<3.83$ ,  $3.83$  to  $<4.83$ , and  $\geq 4.83$  mmol/L with mean values of 3.17, 4.33, and 5.72 mmol/L respectively. HDL-C: Bottom, middle and top third defined as  $<1.14$ ,  $1.15$  to  $<1.45$ , and  $\geq 1.45$  mmol/L with mean values of 0.96, 1.29, and 1.79 mmol/L respectively. Log-triglycerides: bottom, middle and top third defined as  $<0.07$ ,  $0.08$  to  $<0.52$ , and  $\geq 0.52$  with mean values of -0.24, 0.29, and 0.91 respectively. There was no significant association between overall or sex-specific prevalence of diabetes and risk of coronary heart disease or ischaemic stroke (linear meta-regression  $P > 0.1$  for each).



**eFigure 7 Hazard ratios for coronary heart disease and ischaemic stroke by baseline fasting glucose concentration between 3.9 and 5.6 mmol/L, in participants without known diabetes at baseline**

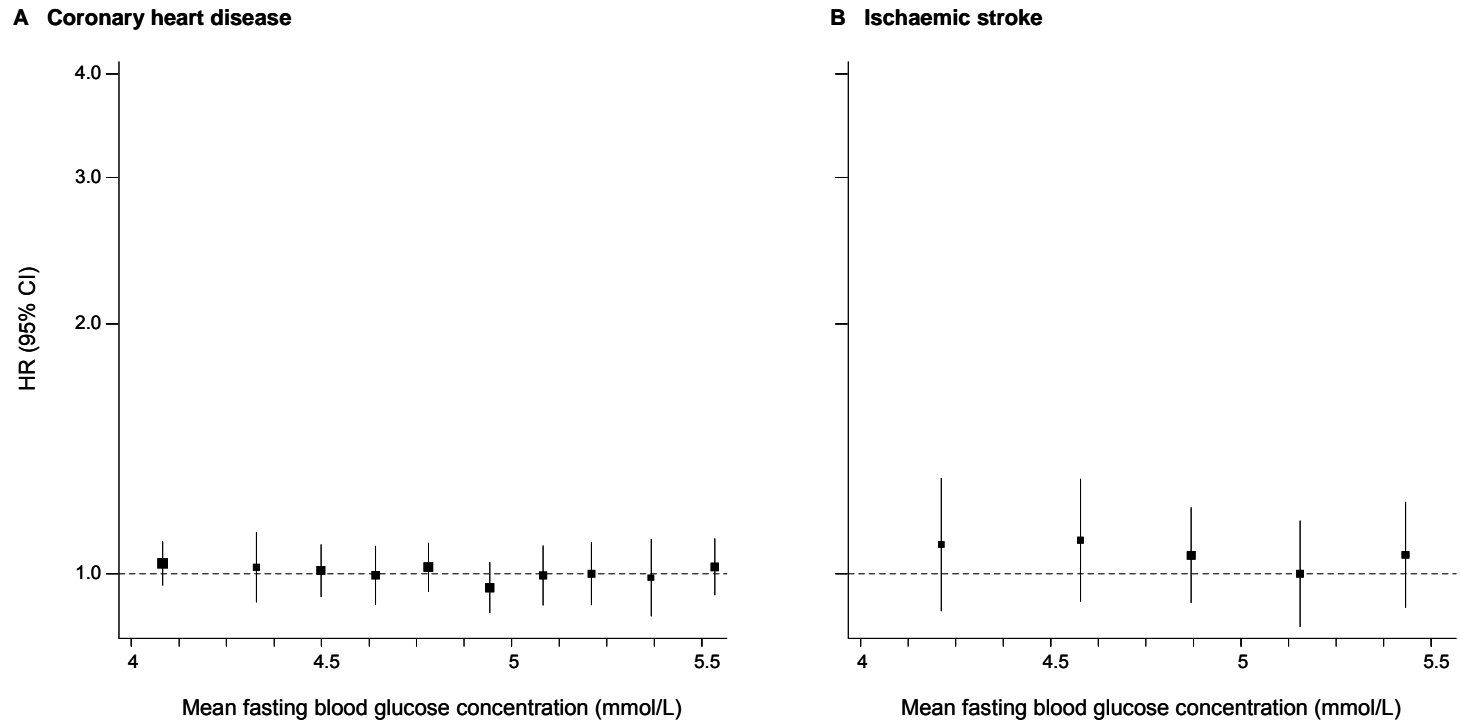

Analyses were based on 179 659 participants (9479 cases) for CHD and 124 414 participants (967 cases) for ischaemic stroke. Participants were classified into tenths of fasting glucose for CHD and fifths for ischaemic stroke. Hazard ratios are plotted against the mean fasting glucose in each group. Reference groups are: the 8<sup>th</sup> quantile for CHD and the 4<sup>th</sup> quantile for stroke (ie, the quantile that contains the overall mean). Regression analyses were stratified, where appropriate, by sex and trial group, and adjusted for age, smoking status, BMI and systolic blood pressure. Studies with fewer than 11 cases of an outcome (with fasting glucose between 3.9 and 5.6 mmol/L) were excluded from analysis of that outcome. Sizes of data markers are proportional to the inverse of the variance of the hazard ratios.

**eFigure 8 Hazard ratios for coronary heart disease in people with impaired fasting glucose, by individual-level characteristics**

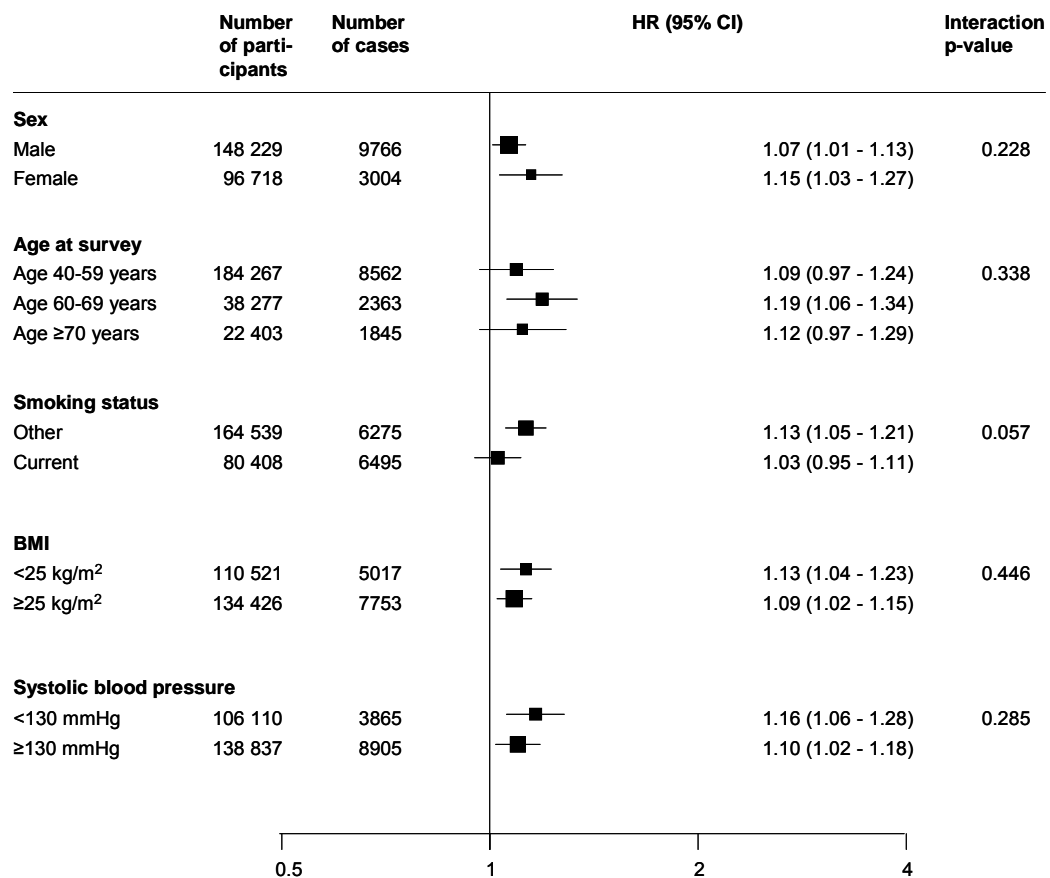

Impaired fasting glucose was defined as those without known diabetes at baseline and fasting glucose values between 5.6 and 6.99 mmol/L (according to ADA criteria). HRs were calculated in reference to people with fasting glucose values below 5.6mmol/L. Regression analyses were stratified, where appropriate, by sex and trial group, and adjusted for age, smoking status, BMI and systolic blood pressure. Studies with fewer than 11 coronary heart disease cases were excluded from analysis. P-values for interaction were calculated from analyses using continuous variables where appropriate. Sizes of data markers are proportional to the inverse of the variance of the hazard ratios. Numbers of participants and cases include people with impaired fasting glucose and those in the reference group.

**eFigure 9 Hazard ratios for vascular outcomes in people with diabetes at baseline compared with people without diabetes, using 1-stage (“fixed-effect”) regression models**

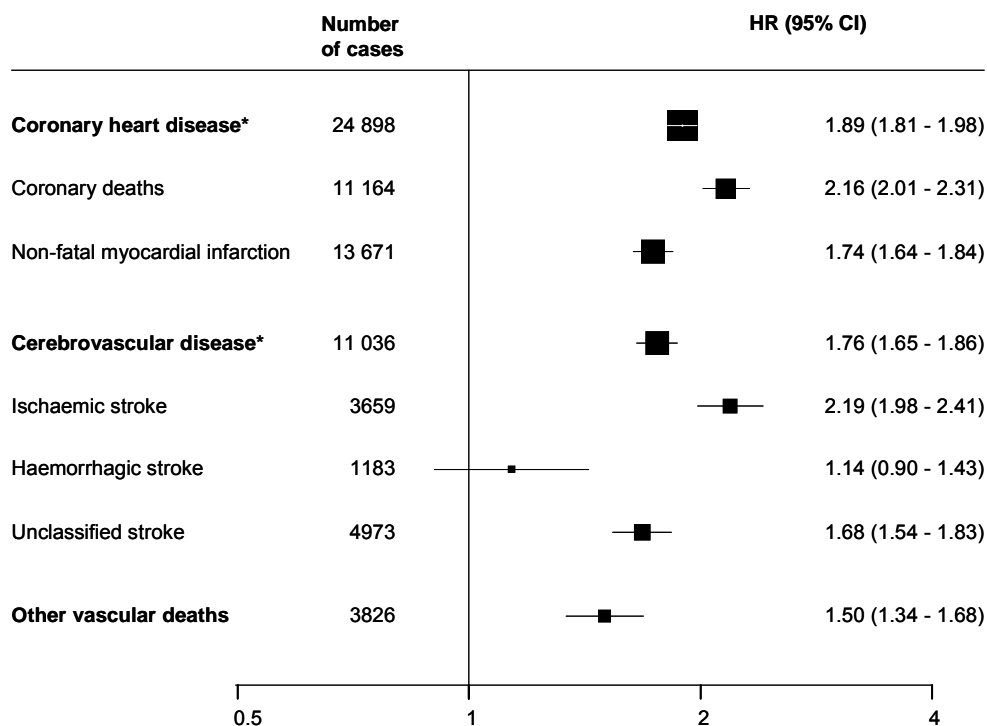

Analyses were based on up to 524 422 participants from up to 82 studies. People were classified as having diabetes based on self-report or fasting glucose  $\geq 7$  mmol/L. Regression analyses were stratified, where appropriate, by sex and trial group, and adjusted for age, smoking status, BMI and systolic blood pressure. Studies with fewer than 11 cases of an outcome were excluded from the analysis of that outcome. Sizes of data markers are proportional to the inverse of the variance of the hazard ratios.

\*Includes both fatal and non-fatal events

**eFigure 10 Hazard ratios for coronary heart disease by baseline fasting glucose concentration using 1-stage (“fixed effect”) and continuous regression models**

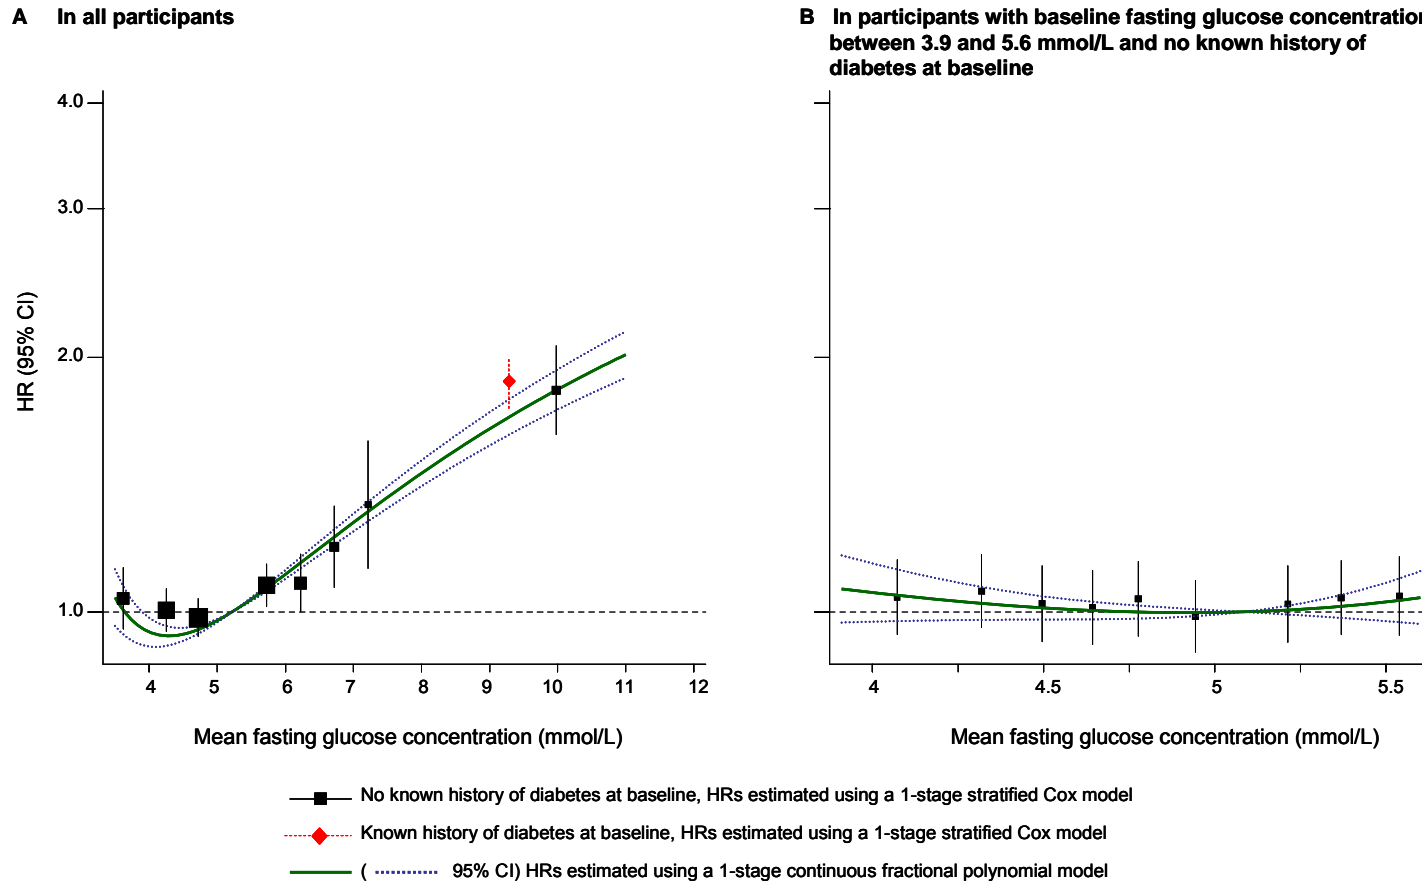

Regression analyses were stratified, where appropriate, by sex and trial group, and adjusted for age, smoking status, BMI and systolic blood pressure. Studies with fewer than 11 CHD cases and all case-control studies were excluded. Sizes of data markers are proportional to the inverse of the variance of the hazard ratios. Analyses in (a) were based on 276 964 participants (14 458 cases). Participants with fasting glucose values in the top and bottom 0.2% were excluded. Participants without known diabetes at baseline are classified into groups of fasting glucose: <4, 4-4.5, 4.5-5, 5-5.5, 5.5-6, 6-6.5, 6.5-7, 7-7.5 and >7.5 mmol/L. The reference group is defined as those without known diabetes with glucose values between 5 – 5.5 mmol/L. Analyses in (b) were based on 178 164 participants (9263 cases). Participants are classified into tenths of fasting glucose. The reference group is the 7<sup>th</sup> quantile.

eFigure 11 (a) Study-specific hazard ratios for coronary heart disease in people with diabetes at baseline compared with people without diabetes

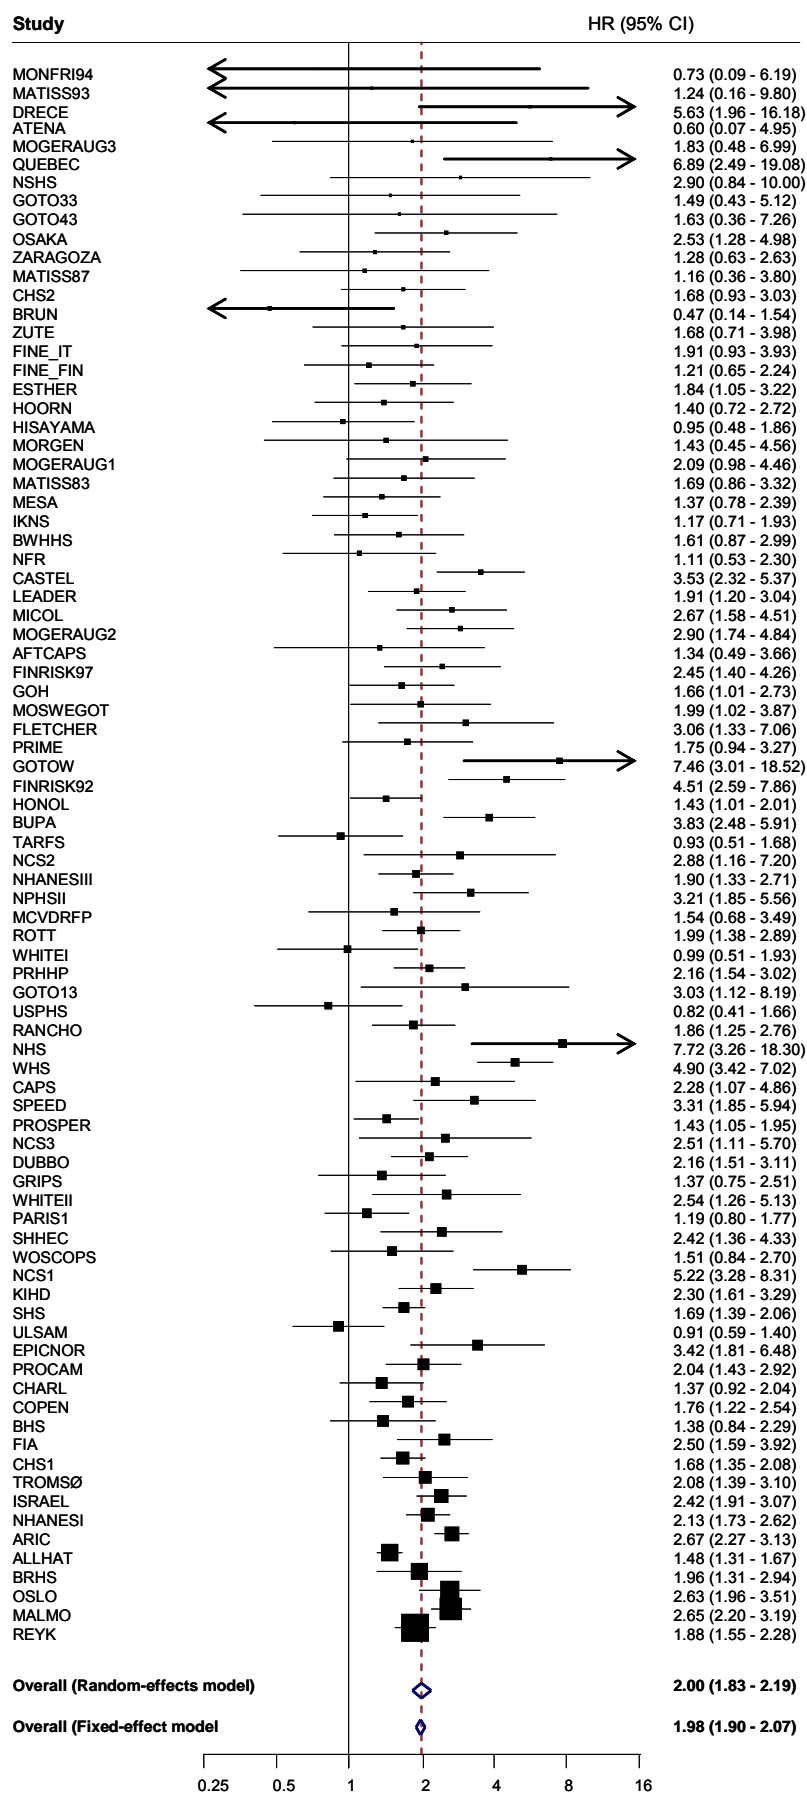

Regression analyses were stratified, where appropriate, by sex and trial group, and adjusted for age, smoking status, BMI and systolic blood pressure. Studies are ordered (top to bottom) by increasing number of CHD cases. Studies with fewer than 11 CHD cases were excluded from analysis. Sizes of data markers are proportional to the inverse of the variance of the hazard ratios.

eFigure 11 (b)

**Study-specific hazard ratios for ischaemic stroke in people with diabetes at baseline compared with people without diabetes**

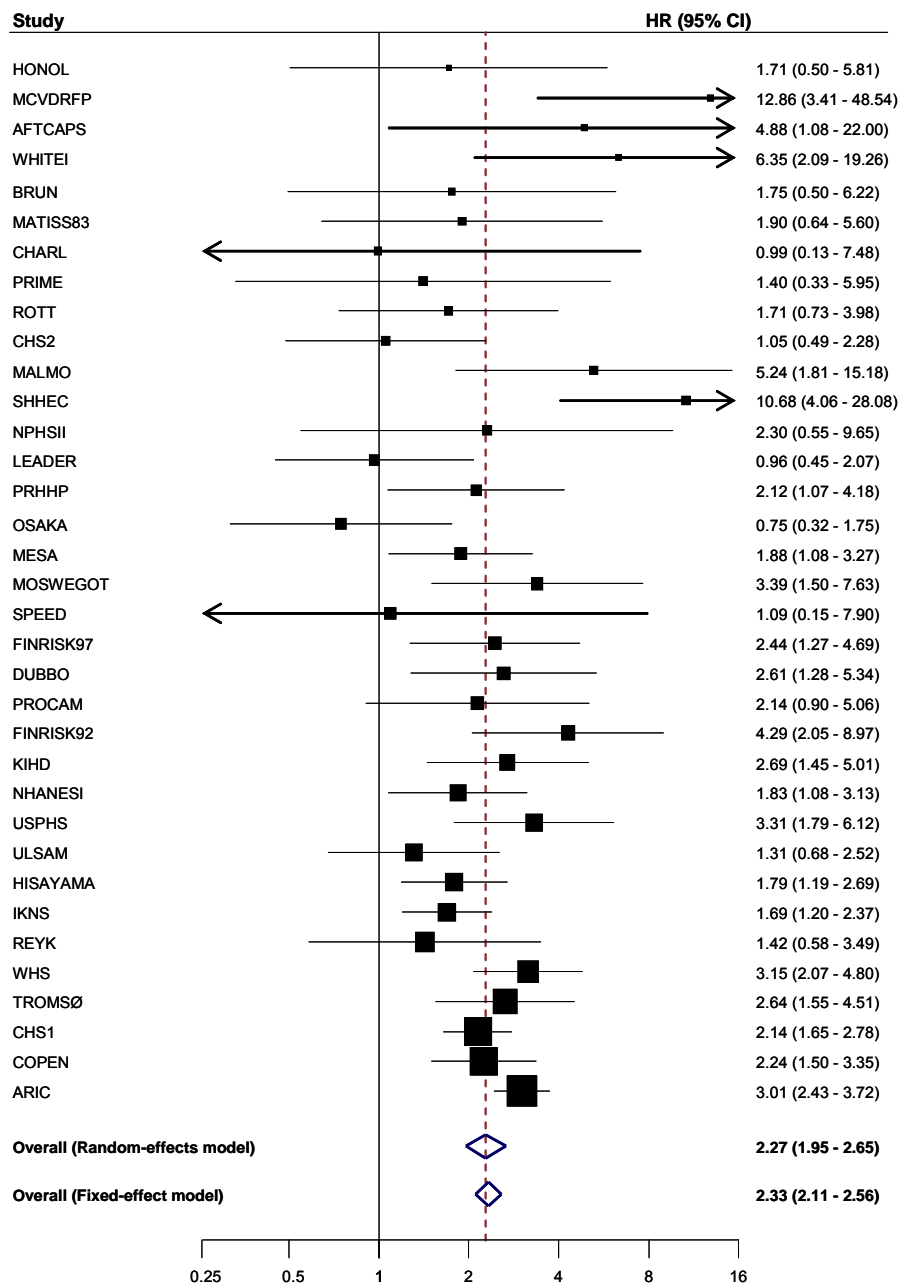

Regression analyses were stratified, where appropriate, by sex and trial group, and adjusted for age, smoking status, BMI and systolic blood pressure. Studies are ordered (top to bottom) by increasing number of ischaemic stroke cases. Studies with fewer than 11 ischaemic stroke cases were excluded from analysis. Sizes of data markers are proportional to the inverse of the variance of the hazard ratios.

**eFigure 12 Hazard ratios for coronary heart disease and ischaemic stroke by baseline fasting glucose concentration, ignoring known history of diabetes at baseline**

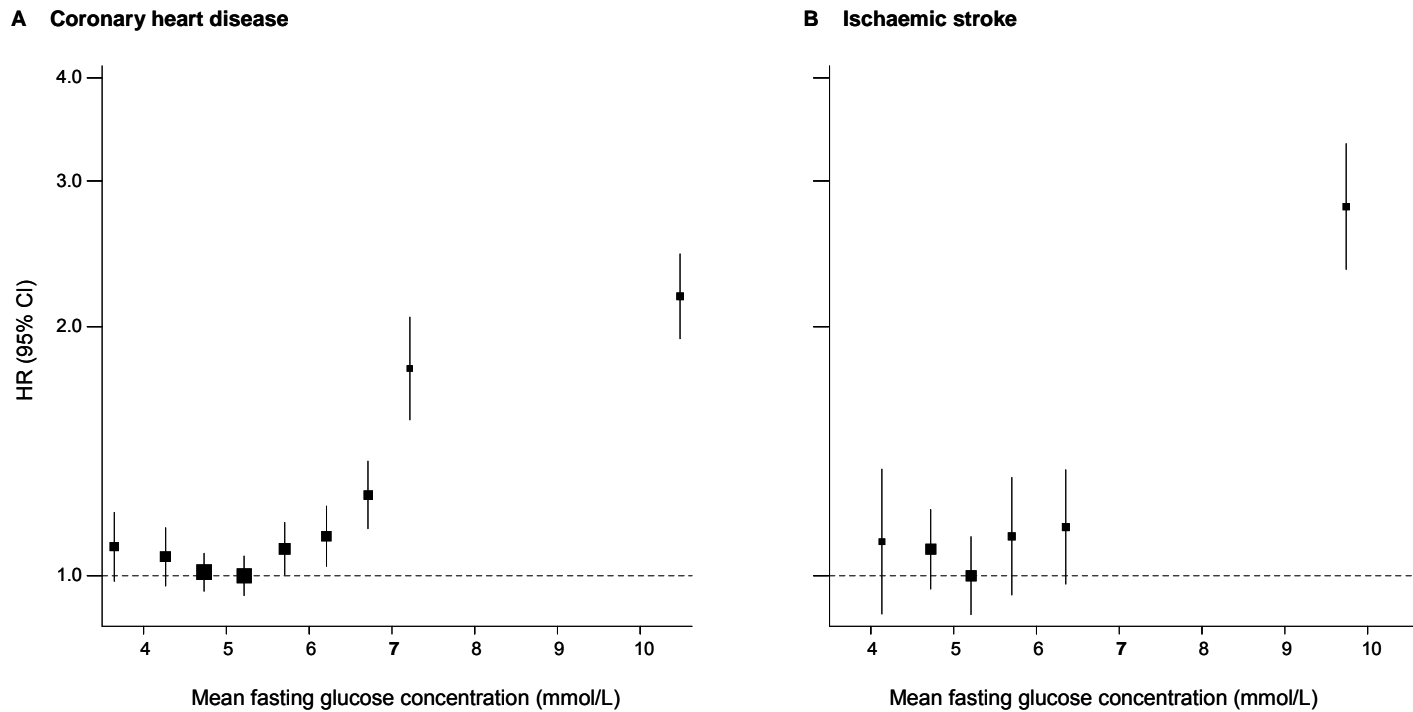

Analyses were based on 279 290 participants (14 814 cases) for CHD and 175 542 participants (1754 cases) for ischaemic stroke. Participants are classified into groups of fasting glucose (coronary heart disease: <4, 4-4.5, 4.5-5, 5-5.5, 5.5-6, 6-6.5, 6.5-7, 7-7.5 and >7.5 mmol/L; ischaemic stroke: <4.5, 4.5-5, 5-5.5, 5.5-6, 6-7, and >7 mmol/L). Hazard ratios are plotted against the mean fasting glucose in each group. The reference group for both outcomes is 5-5.5 mmol/L. Regression analyses were stratified, where appropriate, by sex and trial group, and adjusted for age, smoking status, BMI and systolic blood pressure. Studies with fewer than 11 cases of an outcome were excluded from analysis of that outcome. Sizes of data markers are proportional to the inverse of the variance of the hazard ratios.

**eFigure 13** Hazard ratios for coronary heart disease and ischaemic stroke by baseline fasting glucose concentration, including categories in the range 7-9 mmol/L

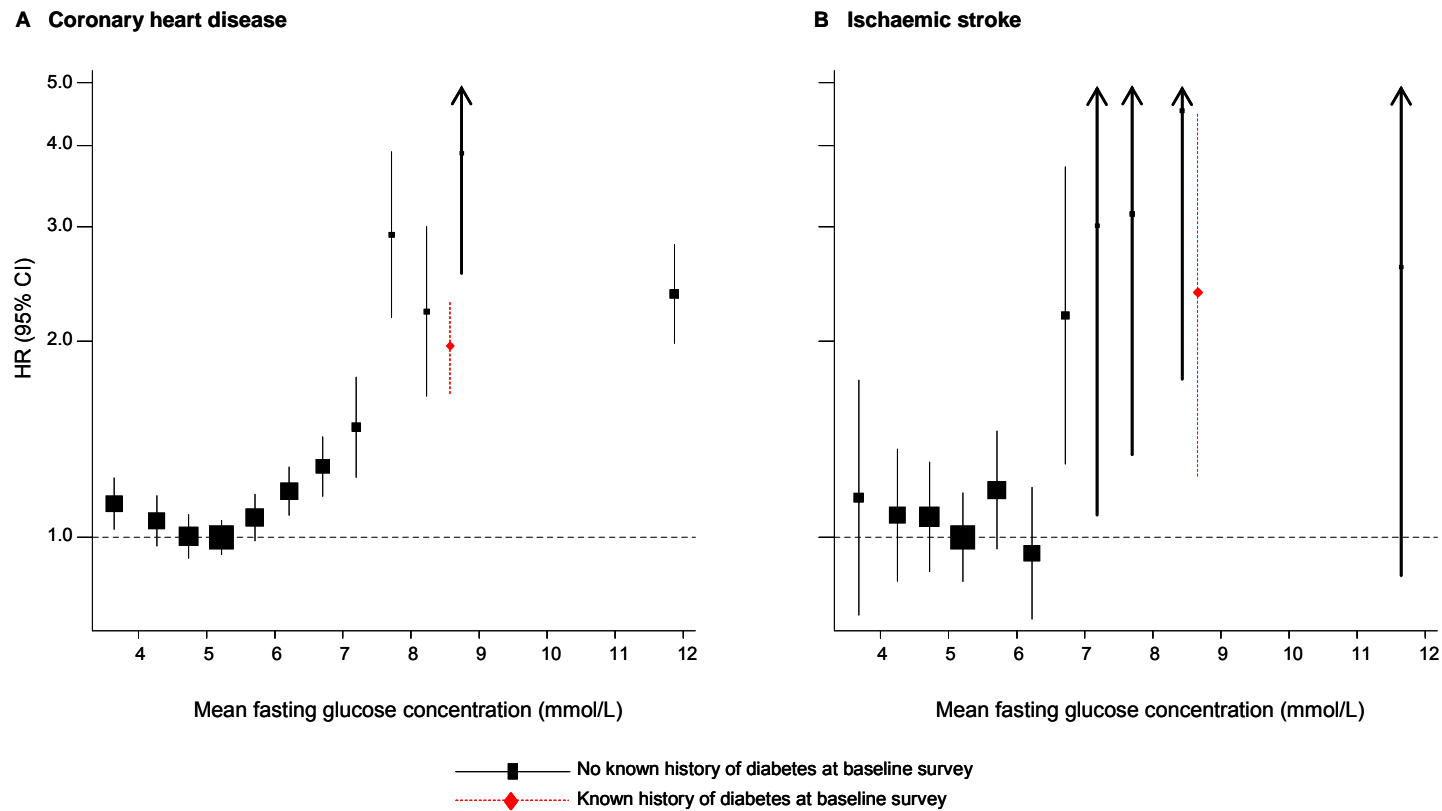

Analyses were based on 279 290 participants (14 814 cases) for CHD and 175 542 participants (1754 cases) for ischaemic stroke. People were classified as having diabetes based on self-report or fasting glucose  $\geq 7$  mmol/L. Participants without known diabetes at baseline are classified into groups of fasting glucose (coronary heart disease: <4, 4-4.5, 4.5-5, 5-5.5, 5.5-6, 6-6.5, 6.5-7, 7-7.5, 7.5-8, 8-8.5, 8.5-9 and >9 mmol/L; ischaemic stroke: <4.5, 4.5-5, 5-5.5, 5.5-6, 6-6.5, 6.5-7, 7-7.5, 7.5-8, 8-8.5, 8.5-9 and >9 mmol/L). Hazard ratios are plotted against the mean fasting glucose in each group. The reference group for both outcomes is 5-5.5 mmol/L. Regression analyses were stratified, where appropriate, by sex and trial group, and adjusted for age, smoking status, BMI and systolic blood pressure. Studies with fewer than 11 cases of an outcome were excluded from analysis of that outcome. Sizes of data markers are proportional to the inverse of the variance of the hazard ratios.



**eFigure 14 Hazard ratios for coronary heart disease and vascular death in people with diabetes compared with people without diabetes, allowing for time-dependent diabetes status**

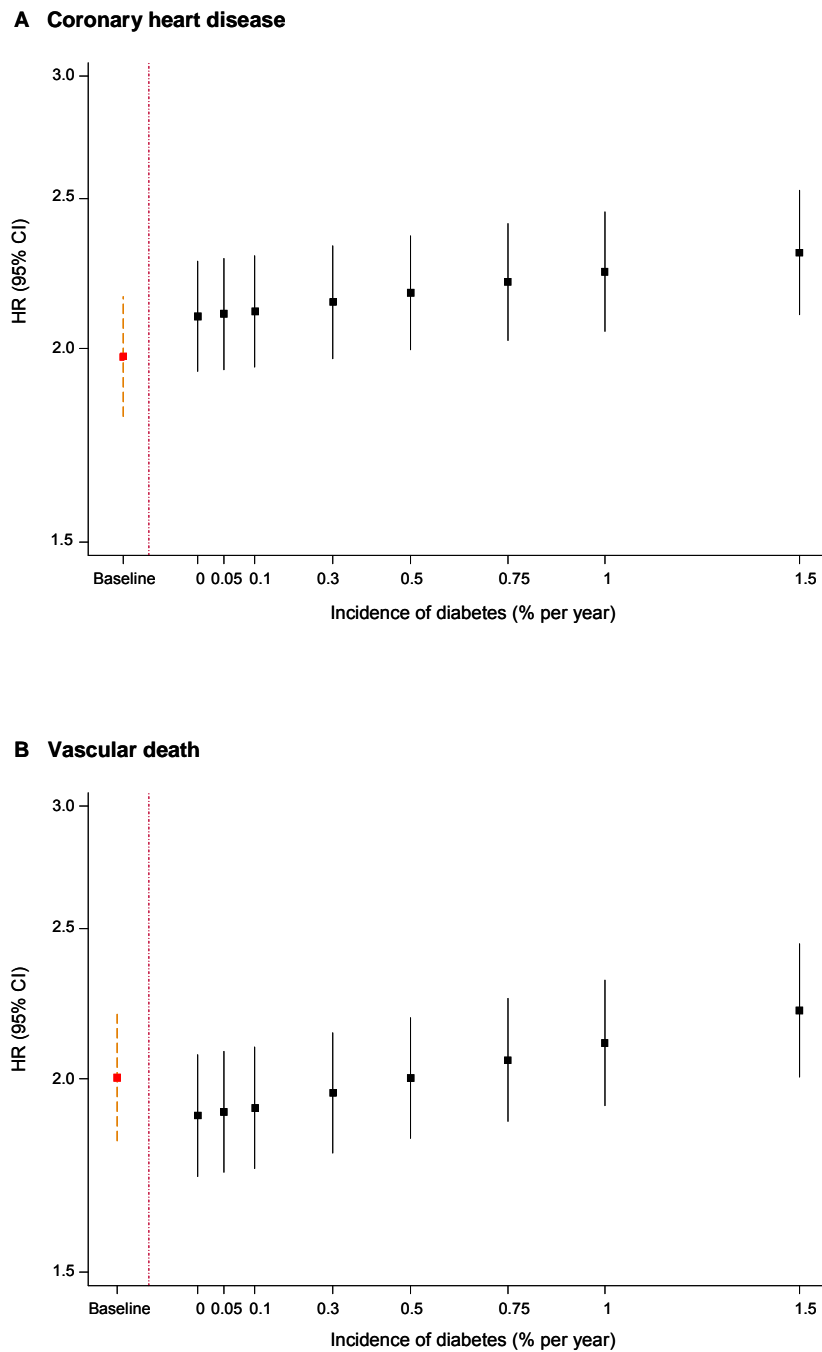

Analyses were based on 524 422 participants (24 898 cases) for CHD and 501 166 participants (23 706 cases) for vascular deaths. HRs were estimated using a two-stage approach where study-specific HRs were calculated then pooled across studies by random-effects meta-analyses. In the first stage, regression analyses were stratified, where appropriate, by sex and trial group, and adjusted for age, smoking status, BMI and systolic blood pressure. In the baseline analyses (indicated by red markers) diabetes status was defined only according to the baseline measurement. In the other analyses, diabetes status was modelled as a time dependent continuous variable to represent the probability of having diabetes (range between 0 and 1). Multiple records were used for each participant when available. Up to 428 241 repeat measurements from 179 054 participants contributed to the analyses. Diabetes status was assessed at baseline and reassessed at each re-survey. People were classified as having diabetes based on self-report or fasting glucose  $\geq 7$  mmol/L. Participants classified as having diabetes kept diabetes status of 1 until time of event. For participants with no known diabetes, the probability of having diabetes was calculated according to the incident rates of diabetes (% per year) based on the cumulative exponential distribution. Case-control and studies with fewer than 11 cases of an outcome were excluded from analysis of that outcome. Sizes of data markers are proportional to the inverse of the variance of the hazard ratios.

**eTable 1. Characteristics of the 102 individual studies included in analyses.**

| <b>Study abbreviation</b> | <b>Location</b> | <b>Population source</b>                                   | <b>Sampling method</b> | <b>No. of participants</b> | <b>Mean (SD) age at survey</b> | <b>Number (%) Male</b> | <b>Number (%) with diabetes at baseline</b> | <b>Mean (SD) fasting glucose (mmol/L) at baseline</b> |
|---------------------------|-----------------|------------------------------------------------------------|------------------------|----------------------------|--------------------------------|------------------------|---------------------------------------------|-------------------------------------------------------|
| <i>Cohort studies</i>     |                 |                                                            |                        |                            |                                |                        |                                             |                                                       |
| ARIC                      | USA             | Households                                                 | Random                 | 14590                      | 54 (6)                         | 6297 (43)              | 1589 (11)                                   | 6.0 (2.1)                                             |
| ATENA                     | Italy           | Volunteers                                                 | Random                 | 4752                       | 50 (7)                         | 0 (0)                  | 118 (2)                                     | -                                                     |
| ATTICA                    | Greece          | General population                                         | Random                 | 1601                       | 51 (11)                        | 822 (51)               | 147 (9)                                     | 5.3 (1.5)                                             |
| BHS                       | Australia       | Electoral rolls                                            | Complete               | 6221                       | 45 (16)                        | 2940 (47)              | 122 (2)                                     | 5.1 (1.1)                                             |
| BRHS                      | UK              | GP/Health service lists                                    | Random                 | 6810                       | 50 (6)                         | 6810 (100)             | 77 (1)                                      | -                                                     |
| BRUN                      | Italy           | Population register                                        | Random                 | 817                        | 58 (11)                        | 398 (49)               | 44 (5)                                      | 5.5 (1.0)                                             |
| BUPA                      | UK              | GP/Health service lists                                    | Complete               | 20884                      | 47 (8)                         | 20884 (100)            | 159 (1)                                     | 5.4 (1.1)                                             |
| BWHHS                     | UK              | General population                                         | Random                 | 3030                       | 68 (5)                         | 0 (0)                  | 245 (8)                                     | 6.0 (1.4)                                             |
| CAPS                      | UK              | Electoral rolls                                            | Random                 | 2161                       | 52 (5)                         | 2161 (100)             | 30 (1)                                      | 6.3 (2.1)                                             |
| CASTEL                    | Italy           | Screening                                                  | Complete               | 2534                       | 73 (5)                         | 963 (38)               | 484 (19)                                    | 6.1 (1.7)                                             |
| CHARL                     | USA             | Households                                                 | Random                 | 1945                       | 50 (11)                        | 866 (45)               | 83 (4)                                      | -                                                     |
| CHS1                      | USA             | Medicare lists                                             | Random                 | 3872                       | 72 (5)                         | 1483 (38)              | 495 (13)                                    | 6.0 (1.8)                                             |
| CHS2                      | USA             | Medicare lists                                             | Random                 | 473                        | 72 (5)                         | 178 (38)               | 104 (22)                                    | 6.5 (2.9)                                             |
| COPEN                     | Denmark         | General population                                         | Random                 | 8414                       | 58 (15)                        | 3587 (43)              | 247 (3)                                     | -                                                     |
| DISCO                     | Italy           | NR                                                         | NR                     | 1932                       | 50 (11)                        | 846 (44)               | 79 (4)                                      | -                                                     |
| DRECE                     | Spain           | General population                                         | Random                 | 2860                       | 41 (11)                        | 1384 (48)              | 192 (7)                                     | 5.3 (1.4)                                             |
| DUBBO                     | Australia       | Electoral rolls                                            | Complete               | 2061                       | 68 (7)                         | 866 (42)               | 139 (7)                                     | 5.1 (1.1)                                             |
| EMOFRI                    | Italy           | General population                                         | Random                 | 360                        | 55 (6)                         | 176 (49)               | 24 (7)                                      | 5.4 (1.7)                                             |
| EPESEBOS                  | USA             | General population                                         | Complete               | 1033                       | 72 (5)                         | 353 (34)               | 131 (13)                                    | -                                                     |
| EPESEIOW                  | USA             | General population                                         | Complete               | 1588                       | 73 (5)                         | 511 (32)               | 115 (7)                                     | -                                                     |
| EPESENCA                  | USA             | General population                                         | Random                 | 1348                       | 72 (5)                         | 448 (33)               | 177 (13)                                    | -                                                     |
| EPESENHA                  | USA             | General population                                         | Random                 | 814                        | 73 (6)                         | 302 (37)               | 92 (11)                                     | -                                                     |
| ESTHER                    | Germany         | GP listings                                                | Complete               | 8042                       | 62 (7)                         | 3394 (42)              | 1055 (13)                                   | 5.4 (1.6)                                             |
| FINE_FIN                  | Finland         | NR                                                         | NR                     | 279                        | 77 (5)                         | 279 (100)              | 42 (15)                                     | 6.1 (2.0)                                             |
| FINE_IT                   | Italy           | Survivors of an existing cohort                            | Complete               | 475                        | 73 (5)                         | 475 (100)              | 41 (9)                                      | -                                                     |
| FINRISK92                 | Finland         | General population                                         | Random                 | 5263                       | 46 (10)                        | 2438 (46)              | 96 (2)                                      | -                                                     |
| FINRISK97                 | Finland         | General population                                         | Random                 | 6328                       | 51 (11)                        | 3138 (50)              | 213 (3)                                     | -                                                     |
| FRAMOFF                   | USA             | Offspring or spouse to Framingham heart study participants | Complete               | 2854                       | 54 (10)                        | 1269 (44)              | 291 (10)                                    | -                                                     |
| GOH                       | Israel          | General population                                         | Random                 | 2772                       | 44 (9)                         | 1380 (50)              | 255 (9)                                     | 8.8 (3.4)                                             |
| GOTO13                    | Sweden          | General population                                         | Complete               | 766                        | 54 (0)                         | 766 (100)              | 8 (1)                                       | -                                                     |

| Study abbreviation | Location    | Population source       | Sampling method | No. of participants | Mean (SD) age at survey | Number (%) Male | Number (%) with diabetes at baseline | Mean (SD) fasting glucose (mmol/L) at baseline |
|--------------------|-------------|-------------------------|-----------------|---------------------|-------------------------|-----------------|--------------------------------------|------------------------------------------------|
| GOTO33             | Sweden      | General population      | Complete        | 733                 | 51 (0)                  | 733 (100)       | 54 (7)                               | 5.1 (1.9)                                      |
| GOTO43             | Sweden      | General population      | Complete        | 773                 | 50 (0)                  | 773 (100)       | 26 (3)                               | 4.7 (1.3)                                      |
| GOTOW              | Sweden      | General population      | Random          | 1455                | 47 (7)                  | 0 (0)           | 27 (2)                               | 4.2 (1.1)                                      |
| GREPCO             | Italy       | NR                      | NR              | 815                 | 44 (8)                  | 0 (0)           | 17 (2)                               | -                                              |
| GRIPS              | Germany     | Occupational            | Complete        | 5786                | 48 (5)                  | 5786 (100)      | 124 (2)                              | -                                              |
| HBS                | Finland     | Occupational            | Complete        | 1142                | 60 (4)                  | 1142 (100)      | 19 (2)                               | 4.9 (1.0)                                      |
| HELSINAG           | Finland     | Population register     | Random          | 527                 | 79 (4)                  | 131 (25)        | 0 (0)                                | 5.6 (1.9)                                      |
| HISAYAMA           | Japan       | General population      | Complete        | 2576                | 59 (12)                 | 1087 (42)       | 295 (11)                             | 5.8 (1.3)                                      |
| HONOL              | USA         | GP/Health service lists | Complete        | 2571                | 78 (4)                  | 2571 (100)      | 651 (25)                             | -                                              |
| HOORN              | Netherlands | General population      | Random          | 2230                | 61 (7)                  | 983 (44)        | 207 (9)                              | 5.7 (1.5)                                      |
| IKNS               | Japan       | General population      | Complete        | 8043                | 58 (10)                 | 3300 (41)       | 1305 (16)                            | 6.0 (1.3)                                      |
| ISRAEL             | Israel      | Occupational            | Occupational    | 7838                | 49 (7)                  | 7838 (100)      | 384 (5)                              | -                                              |
| KIHD               | Finland     | General population      | Random          | 2068                | 53 (5)                  | 2068 (100)      | 91 (4)                               | 4.7 (1.0)                                      |
| MALMO              | Sweden      | Screening               | Random          | 32495               | 46 (7)                  | 21923 (67)      | 630 (2)                              | 5.0 (1.0)                                      |
| MATISS83           | Italy       | Electoral rolls         | Random          | 2557                | 51 (10)                 | 1197 (47)       | 168 (7)                              | 5.3 (1.3)                                      |
| MATISS87           | Italy       | Electoral rolls         | Random          | 2113                | 52 (9)                  | 933 (44)        | 101 (5)                              | 5.3 (1.2)                                      |
| MATISS93           | Italy       | Electoral rolls         | Random          | 1211                | 49 (9)                  | 588 (49)        | 66 (5)                               | 5.0 (1.4)                                      |
| MCVDRFP            | Netherlands | General population      | Random          | 23111               | 42 (10)                 | 10704 (46)      | 231 (1)                              | -                                              |
| MESA               | USA         | General population      | Random          | 6760                | 62 (10)                 | 3186 (47)       | 844 (12)                             | 5.4 (1.7)                                      |
| MICOL              | Italy       | Electoral rolls         | NR              | 23196               | 51 (10)                 | 12810 (55)      | 1149 (5)                             | -                                              |
| MOGERAUG1          | Germany     | General population      | Random          | 874                 | 54 (6)                  | 874 (100)       | 37 (4)                               | -                                              |
| MOGERAUG2          | Germany     | General population      | Random          | 4025                | 53 (12)                 | 1974 (49)       | 200 (5)                              | -                                              |
| MOGERAUG3          | Germany     | General population      | Random          | 3398                | 55 (11)                 | 1676 (49)       | 183 (5)                              | -                                              |
| MONFRI86           | Italy       | NR                      | NR              | 1138                | 49 (9)                  | 556 (49)        | 11 (1)                               | -                                              |
| MONFRI89           | Italy       | NR                      | NR              | 1105                | 48 (8)                  | 545 (49)        | 14 (1)                               | -                                              |
| MONFRI94           | Italy       | Electoral rolls         | Random          | 1296                | 49 (8)                  | 632 (49)        | 96 (7)                               | 5.7 (1.4)                                      |
| MORGEN             | Netherlands | General population      | Random          | 17739               | 46 (9)                  | 8063 (45)       | 226 (1)                              | -                                              |
| MOSWEGOT           | Sweden      | General population      | Random          | 4157                | 47 (11)                 | 1972 (47)       | 99 (2)                               | -                                              |
| MRCOLD             | UK          | GP/Health service lists | Random          | 10521               | 80 (4)                  | 3937 (37)       | 271 (3)                              | -                                              |
| NCS1               | Norway      | General population      | Complete        | 24238               | 42 (4)                  | 11943 (49)      | 189 (1)                              | 5.7 (1.1)                                      |
| NCS2               | Norway      | General population      | Complete        | 13106               | 42 (4)                  | 6684 (51)       | 76 (1)                               | 5.7 (0.8)                                      |
| NCS3               | Norway      | General population      | Complete        | 10179               | 42 (4)                  | 5283 (52)       | 47 (0)                               | 5.6 (0.7)                                      |
| NFR                | Italy       | NR                      | NR              | 3133                | 55 (5)                  | 3133 (100)      | 202 (6)                              | -                                              |

| Study abbreviation          | Location    | Population source                  | Sampling method   | No. of participants | Mean (SD) age at survey | Number (%) Male | Number (%) with diabetes at baseline | Mean (SD) fasting glucose (mmol/L) at baseline |
|-----------------------------|-------------|------------------------------------|-------------------|---------------------|-------------------------|-----------------|--------------------------------------|------------------------------------------------|
| NHANESI                     | USA         | General population                 | Cluster           | 11621               | 49 (15)                 | 4617 (40)       | 631 (5)                              | -                                              |
| NHANESIII                   | USA         | General population                 | Cluster           | 12566               | 54 (16)                 | 5801 (46)       | 1226 (10)                            | 5.8 (1.9)                                      |
| NPHSII                      | UK          | GP/Health service lists            | Complete          | 2968                | 57 (3)                  | 2968 (100)      | 74 (2)                               | -                                              |
| NSHS                        | Canada      | General population                 | Random            | 1944                | 54 (16)                 | 932 (48)        | 108 (6)                              | -                                              |
| OSAKA                       | Japan       | General population or occupational | Complete          | 12307               | 52 (10)                 | 8335 (68)       | 1231 (10)                            | 5.7 (1.2)                                      |
| OSLO                        | Norway      | General population                 | Complete & random | 17392               | 44 (6)                  | 17392 (100)     | 221 (1)                              | 5.8 (1.0)                                      |
| PARIS1                      | France      | Occupational                       | Complete          | 7079                | 47 (2)                  | 7079 (100)      | 385 (5)                              | 5.7 (0.9)                                      |
| PRHHP                       | Caribbean   | General population                 | Complete          | 6350                | 54 (6)                  | 6350 (100)      | 644 (10)                             | 5.4 (1.7)                                      |
| PRIME                       | France/NI   | General population                 | Quota             | 9582                | 55 (3)                  | 9582 (100)      | 385 (4)                              | -                                              |
| PROCAM                      | Germany     | Occupational                       | Complete          | 20218               | 44 (10)                 | 14648 (72)      | 414 (2)                              | -                                              |
| QUEBEC                      | Canada      | General population                 | Random            | 1307                | 57 (7)                  | 1307 (100)      | 90 (7)                               | -                                              |
| RANCHO                      | USA         | Households                         | Complete          | 1806                | 68 (11)                 | 744 (41)        | 133 (7)                              | 5.5 (1.1)                                      |
| REYK                        | Iceland     | General population                 | Complete          | 16840               | 52 (9)                  | 8060 (48)       | 322 (2)                              | 4.5 (0.8)                                      |
| ROTT                        | Netherlands | General population                 | Complete          | 4823                | 68 (8)                  | 1824 (38)       | 432 (9)                              | 8.7 (4.5)                                      |
| SHHEC                       | UK          | GP/Health service lists            | Random            | 10966               | 49 (7)                  | 5398 (49)       | 143 (1)                              | -                                              |
| SHS                         | USA         | General population                 | Complete          | 4131                | 56 (8)                  | 1614 (39)       | 2032 (49)                            | 8.3 (4.2)                                      |
| SPEED                       | UK          | GP/Health service lists            | Complete          | 2126                | 55 (4)                  | 2126 (100)      | 41 (2)                               | -                                              |
| TARFS                       | Turkey      | Households                         | Random            | 3535                | 43 (13)                 | 1760 (50)       | 95 (3)                               | 4.9 (1.2)                                      |
| TROMSØ                      | Norway      | Households                         | Complete          | 22568               | 44 (15)                 | 10597 (47)      | 380 (2)                              | -                                              |
| ULSAM                       | Sweden      | General population                 | Complete          | 2280                | 50 (1)                  | 2280 (100)      | 122 (5)                              | 5.0 (0.9)                                      |
| VHMPP                       | Austria     | Health check-up                    | Complete          | 66395               | 49 (13)                 | 32195 (48)      | 0 (0)                                | 5.0 (1.5)                                      |
| VITA                        | Italy       | Census lists                       | Random            | 9031                | 51 (8)                  | 4055 (45)       | 0 (0)                                | 4.6 (1.3)                                      |
| WHITEI                      | UK          | Occupational                       | Complete          | 4013                | 76 (5)                  | 4013 (100)      | 191 (5)                              | -                                              |
| WHITEII                     | UK          | Occupational                       | Complete          | 10191               | 45 (6)                  | 6802 (67)       | 92 (1)                               | 6.2 (-)                                        |
| WHS                         | USA         | Occupational                       | Complete          | 28022               | 55 (7)                  | 0 (0)           | 770 (3)                              | -                                              |
| ZARAGOZA                    | Spain       | GP/Health service lists            | Complete          | 3662                | 58 (12)                 | 1528 (42)       | 465 (13)                             | 5.9 (1.6)                                      |
| ZUTE                        | Netherlands | General population                 | Random            | 390                 | 76 (4)                  | 390 (100)       | 30 (8)                               | -                                              |
| <b>Case-control studies</b> |             |                                    |                   |                     |                         |                 |                                      |                                                |
| USPHS                       | USA         | Occupational                       | Complete          | 934                 | 60 (9)                  | 934 (100)       | 56 (6)                               | -                                              |
| EPICNOR                     | UK          | GP/Health service lists            | Complete          | 1422                | 66 (8)                  | 966 (68)        | 46 (3)                               | -                                              |
| FIA                         | Sweden      | General population                 | Random            | 2624                | 54 (7)                  | 2116 (81)       | 106 (4)                              | 5.5 (1.1)                                      |
| FLETCHER                    | New Zealand | Occupational, electoral rolls      | Complete & random | 477                 | 57 (12)                 | 405 (85)        | 27 (6)                               | -                                              |
| HPFS                        | USA         | Occupational                       | Random            | 736                 | 65 (8)                  | 736 (100)       | 47 (6)                               | -                                              |

| Study abbreviation                                                           | Location                                 | Population source  | Sampling method | No. of participants | Mean (SD) age at survey | Number (%) Male    | Number (%) with diabetes at baseline | Mean (SD) fasting glucose (mmol/L) at baseline |
|------------------------------------------------------------------------------|------------------------------------------|--------------------|-----------------|---------------------|-------------------------|--------------------|--------------------------------------|------------------------------------------------|
| NHS                                                                          | USA                                      | Occupational       | Random          | 717                 | 60 (6)                  | 0 (0)              | 77 (11)                              | -                                              |
| <i>Clinical trials</i>                                                       |                                          |                    |                 |                     |                         |                    |                                      |                                                |
| AFTCAPS                                                                      | USA                                      | Screening          | Complete        | 6577                | 58 (7)                  | 5587 (85)          | 127 (2)                              | -                                              |
| ALLHAT                                                                       | USA/Canada/Puerto Rico/US Virgin Islands | General population | NR              | 28146               | 66 (8)                  | 13806 (49)         | 12049 (43)                           | 7.0 (3.3)                                      |
| LEADER                                                                       | UK                                       | GP listings        | Complete        | 941                 | 68 (9)                  | 941 (100)          | 152 (16)                             | -                                              |
| MRFIT                                                                        | USA                                      | Screening          | Complete        | 12840               | 47 (6)                  | 12840 (100)        | 425 (3)                              | 5.5 (0.9)                                      |
| PROSPER                                                                      | Scotland/Ireland/Netherlands             | Screening          | Complete        | 3253                | 75 (3)                  | 1350 (42)          | 477 (15)                             | 5.5 (1.5)                                      |
| WOSCOPS                                                                      | UK                                       | Screening          | Complete        | 6214                | 55 (6)                  | 6214 (100)         | 115 (2)                              | 4.8 (0.7)                                      |
| <i>Studies with information on history of diabetes at baseline*</i>          |                                          |                    |                 |                     |                         |                    |                                      |                                                |
| <b>TOTAL (97 studies)</b>                                                    |                                          |                    |                 | <b>592830</b>       | <b>52 (13)</b>          | <b>332664 (56)</b> | <b>38851 (7)</b>                     | <b>5.5 (2.0)</b>                               |
| <i>Studies with information on fasting glucose concentration<sup>†</sup></i> |                                          |                    |                 |                     |                         |                    |                                      |                                                |
| <b>TOTAL (54 studies)</b>                                                    |                                          |                    |                 | <b>288483</b>       | <b>53 (12)</b>          | <b>172425 (60)</b> | <b>22434 (8)</b>                     | <b>5.4 (1.8)</b>                               |
| <i>All studies</i>                                                           |                                          |                    |                 |                     |                         |                    |                                      |                                                |
| <b>TOTAL (102 studies)</b>                                                   |                                          |                    |                 | <b>698782</b>       | <b>52 (13)</b>          | <b>398731 (57)</b> | <b>39295 (6)</b>                     | <b>5.4 (1.8)</b>                               |

\*2 studies provided data on previous history of diabetes but were not included in the analyses of diabetes because none of the participants (MRFIT) and all of the participants with history of diabetes information (HBS) had diabetes. 3 studies (HELSINAG, VITA and VHMPP) did not provide data on previous history of diabetes.

<sup>†</sup>48 studies did not provide information on fasting glucose concentration.

**eTable 2 Definitions of outcomes assessed in the current report**

| Outcome                       | ICD version                                                                   |                                                                                    |
|-------------------------------|-------------------------------------------------------------------------------|------------------------------------------------------------------------------------|
|                               | ICD-9                                                                         | ICD-10                                                                             |
| Myocardial infarction         | 410, 412                                                                      | I21, I22                                                                           |
| Coronary heart disease        | 410-414                                                                       | I20-I25                                                                            |
| Ischaemic stroke              | 433, 434                                                                      | I63                                                                                |
| Haemorrhagic stroke           | 431                                                                           | I61                                                                                |
| Unclassified stroke*          | 436                                                                           | I64                                                                                |
| Other cerebrovascular disease | 430, 432, 435, 437, 438                                                       | F01, I60, I62, I65-169                                                             |
| Other cardiovascular outcomes | 093, 391, 393-405, 415-417, 420-429, 440-444, 446-453, 458, 459, 745-747, 798 | G45, I01, I05-115, I20, I26-128, I30-152, I70-182, I87, I95, I97-199, Q20-Q28, R96 |

Corresponding ICD-6, 7 or 8 codes were used for studies that recorded outcomes using earlier ICD versions.

\*Unclassified stroke was defined by the ICD codes stated, or as strokes not specified as ischaemic or haemorrhagic by study-specific codes.

**eTable 3 Baseline characteristics of participants with information on self-reported diabetes status (with or without supplementary information on fasting glucose)**

|                              | Overall summary statistics |                    |                |
|------------------------------|----------------------------|--------------------|----------------|
|                              | No of studies              | No of participants | Mean (SD) or % |
| <b>Diabetes status</b>       | 97                         | 592 830            |                |
| Definite                     | 97                         | 38 851             | 7%             |
| Other                        | 97                         | 553 979            | 93%            |
| <b>Non-lipid markers</b>     |                            |                    |                |
| Age at survey (yrs)          | 97                         | 592 830            | 52 (13)        |
| Fasting glucose (mmol/L)     | 46                         | 182 704            | 5.6 (1.8)      |
| BMI (kg/m <sup>2</sup> )     | 93                         | 564 889            | 26 (4)         |
| Waist-to-hip ratio           | 37                         | 137 552            | 0.89 (0.08)    |
| Waist (cm)                   | 39                         | 138 225            | 90 (12)        |
| SBP (mmHg)                   | 92                         | 563 287            | 136 (19)       |
| DBP (mmHg)                   | 92                         | 564 874            | 82 (11)        |
| <b>Lipid markers</b>         |                            |                    |                |
| Total cholesterol (mmol/L)   | 91                         | 549 935            | 5.80 (1.10)    |
| Non-HDL-C (mmol/L)           | 78                         | 359 519            | 4.48 (1.12)    |
| HDL-C (mmol/L)               | 78                         | 359 844            | 1.34 (0.38)    |
| Log triglycerides            | 77                         | 440 829            | 0.32 (0.52)    |
| Apo B (g/L)                  | 27                         | 110 309            | 1.08 (0.28)    |
| Apo AI (g/L)                 | 26                         | 112 931            | 1.46 (0.27)    |
| <b>Inflammatory markers</b>  |                            |                    |                |
| Log-CRP                      | 40                         | 116 926            | 0.66 (1.11)    |
| Fibrinogen (g/L)             | 40                         | 178 774            | 3.23 (0.71)    |
| <b>Categorical variables</b> |                            |                    |                |
| Sex                          | 97                         | 592 830            |                |
| Male                         | 91                         | 332 664            | 56%            |
| Female                       | 69                         | 260 166            | 44%            |
| Race                         | 74                         | 417 422            |                |
| Non-white                    | 26                         | 61 510             | 15%            |
| White                        | 68                         | 355 912            | 85%            |
| Geographical region          | 97                         | 592 830            |                |
| North America                | 23                         | 1362 88            | 23%            |
| Europe                       | 65                         | 407 933            | 69%            |
| Australia                    | 2                          | 8248               | 1%             |
| New Zealand                  | 1                          | 477                | <0.5%          |
| Israel                       | 2                          | 10 610             | 2%             |
| Japan                        | 3                          | 22 926             | 4%             |
| Caribbean                    | 1                          | 6348               | 1%             |
| Smoking status               | 97                         | 578 291            |                |
| Current                      | 97                         | 196 840            | 34%            |
| Other                        | 97                         | 381 451            | 66%            |
| Alcohol status               | 74                         | 411 109            |                |
| Current                      | 67                         | 254 896            | 62%            |
| Other                        | 72                         | 156 213            | 38%            |

\*2 studies provided data on history of diabetes but were not included in the analyses of diabetes because none of the participants (MRFIT) and all of the participants with history of diabetes information (HBS) had diabetes. A further 93 093 participants had information on fasting glucose concentration at baseline, but no information on self-reported diabetes status.

**eTable 4 Summary of vascular outcomes recorded.**

| Study                 | No. of participants | Median follow-up (5th & 95th percentiles) | All CVD events | All CVD deaths | All CHD | All CHD deaths | All MI | MI (non-fatal) | MI deaths | All CBVD events | Ischaem. stroke | Ischaem. stroke deaths | Ischaem. stroke (non-fatal) | Haemorrhagic stroke | Unclassified stroke | Unclassified stroke deaths | Unclassified stroke (non-fatal) | Other vascular deaths | All-cause mortality |
|-----------------------|---------------------|-------------------------------------------|----------------|----------------|---------|----------------|--------|----------------|-----------|-----------------|-----------------|------------------------|-----------------------------|---------------------|---------------------|----------------------------|---------------------------------|-----------------------|---------------------|
| <i>Cohort studies</i> |                     |                                           |                |                |         |                |        |                |           |                 |                 |                        |                             |                     |                     |                            |                                 |                       |                     |
| ARIC                  | 14590               | 14.0 (5.0 to 15.7)                        | 1642           | 427            | 876     | 200            | 797    | 676            | 121       | 563             | 454             | 2                      | 452                         | 56                  | 16                  | 16                         | 0                               | 110                   | 1501                |
| ATENA                 | 4752                | 6.7 (5.2 to 8.1)                          | 30             | 9              | 18      | 1              | 18     | 17             | 1         | 4               | 1               | 0                      | 1                           | 2                   | 0                   | 0                          | 0                               | 6                     | 40                  |
| ATTICA                | 1601                | 5.0 (5.0 to 5.0)                          | 30             | 30             | 0       | 0              | 0      | 0              | 0         | 0               | 0               | 0                      | 0                           | 0                   | 0                   | 0                          | 0                               | 0                     | 50                  |
| BHS                   | 6221                | 25.0 (7.1 to 33.2)                        | 957            | 957            | 537     | 537            | 361    | 0              | 361       | 223             | 22              | 22                     | 0                           | 21                  | 147                 | 147                        | 0                               | 120                   | 2045                |
| BRHS                  | 6810                | 24.5 (4.7 to 25.4)                        | 1858           | 776            | 1215    | 541            | 1037   | 674            | 363       | 516             | 7               | 7                      | 0                           | 13                  | 475                 | 67                         | 408                             | 85                    | 1960                |
| BRUN                  | 817                 | 15.3 (3.9 to 15.5)                        | 101            | 56             | 54      | 31             | 42     | 23             | 19        | 40              | 24              | 9                      | 15                          | 15                  | 0                   | 0                          | 0                               | 7                     | 180                 |
| BUPA                  | 20884               | 23.7 (11.3 to 26.7)                       | 1505           | 1505           | 1012    | 1012           | 612    | 0              | 612       | 254             | 31              | 31                     | 0                           | 37                  | 145                 | 145                        | 0                               | 164                   | 3543                |
| BWHHS                 | 3030                | 7.3 (3.1 to 8.4)                          | 220            | 34             | 99      | 14             | 85     | 85             | 0         | 102             | 0               | 0                      | 0                           | 1                   | 101                 | 0                          | 101                             | 11                    | 258                 |
| CAPS                  | 2161                | 13.0 (4.0 to 13.0)                        | 295            | 155            | 254     | 114            | 214    | 140            | 74        | 19              | 3               | 3                      | 0                           | 4                   | 9                   | 9                          | 0                               | 15                    | 348                 |
| CASTEL                | 2534                | 11.2 (2.3 to 14.0)                        | 533            | 533            | 97      | 97             | 97     | 0              | 97        | 109             | 0               | 0                      | 0                           | 0                   | 109                 | 109                        | 0                               | 327                   | 1143                |
| CHARL                 | 1945                | 23.8 (3.5 to 40.0)                        | 921            | 575            | 509     | 293            | 356    | 216            | 140       | 251             | 29              | 29                     | 0                           | 35                  | 173                 | 43                         | 130                             | 87                    | 1192                |
| CHS1                  | 3872                | 12.1 (2.0 to 12.9)                        | 1115           | 271            | 593     | 213            | 593    | 380            | 213       | 466             | 367             | 0                      | 367                         | 62                  | 37                  | 2                          | 35                              | 0                     | 1072                |
| CHS2                  | 473                 | 9.1 (1.5 to 9.5)                          | 109            | 27             | 54      | 21             | 54     | 33             | 21        | 49              | 40              | 0                      | 40                          | 5                   | 4                   | 0                          | 4                               | 0                     | 92                  |
| COPEN                 | 8414                | 13.1 (2.4 to 14.9)                        | 1467           | 396            | 544     | 51             | 493    | 493            | 0         | 628             | 387             | 3                      | 384                         | 74                  | 136                 | 23                         | 113                             | 159                   | 1814                |
| DISCO                 | 1932                | 5.5 (5.5 to 9.5)                          | 12             | 12             | 9       | 9              | 5      | 0              | 5         | 3               | 1               | 1                      | 0                           | 1                   | 1                   | 1                          | 0                               | 0                     | 29                  |
| DRECE                 | 2860                | 16.4 (15.5 to 16.6)                       | 31             | 31             | 16      | 16             | 8      | 0              | 8         | 6               | 0               | 0                      | 0                           | 1                   | 4                   | 4                          | 0                               | 5                     | 140                 |
| DUBBO                 | 2061                | 14.1 (1.8 to 14.9)                        | 541            | 135            | 284     | 63             | 221    | 221            | 0         | 191             | 76              | 0                      | 76                          | 19                  | 87                  | 0                          | 87                              | 43                    | 488                 |
| EMOFRI                | 360                 | 6.8 (6.5 to 7.2)                          | 8              | 4              | 2       | 0              | 2      | 2              | 0         | 3               | 2               | 0                      | 2                           | 1                   | 0                   | 0                          | 0                               | 3                     | 9                   |
| EPESEBOS              | 1033                | 10.4 (6.4 to 10.9)                        | 190            | 67             | 81      | 20             | 73     | 61             | 12        | 62              | 48              | 0                      | 48                          | 9                   | 3                   | 0                          | 3                               | 41                    | 149                 |
| EPESEIOW              | 1588                | 10.8 (6.8 to 11.1)                        | 287            | 122            | 101     | 38             | 82     | 63             | 19        | 117             | 47              | 1                      | 46                          | 8                   | 58                  | 12                         | 46                              | 50                    | 266                 |
| EPESENCA              | 1348                | 10.4 (6.5 to 10.9)                        | 241            | 79             | 100     | 32             | 82     | 68             | 14        | 100             | 61              | 1                      | 60                          | 8                   | 30                  | 4                          | 26                              | 35                    | 196                 |
| EPESENHA              | 814                 | 10.5 (6.3 to 10.8)                        | 179            | 86             | 55      | 7              | 52     | 48             | 4         | 47              | 32              | 0                      | 32                          | 3                   | 12                  | 2                          | 10                              | 60                    | 146                 |
| ESTHER                | 8042                | 5.0 (2.0 to 5.9)                          | 211            | 22             | 78      | 11             | 76     | 67             | 9         | 129             | 3               | 3                      | 0                           | 1                   | 124                 | 2                          | 122                             | 2                     | 100                 |
| FINE_FIN              | 279                 | 6.8 (0.9 to 10.0)                         | 112            | 63             | 71      | 38             | 49     | 33             | 16        | 29              | 8               | 8                      | 0                           | 1                   | 16                  | 0                          | 16                              | 8                     | 150                 |
| FINE_IT               | 475                 | 9.6 (1.8 to 21.4)                         | 218            | 150            | 68      | 50             | 48     | 18             | 30        | 106             | 4               | 4                      | 0                           | 5                   | 86                  | 36                         | 50                              | 32                    | 343                 |
| FINRISK92             | 5263                | 11.8 (7.1 to 11.9)                        | 295            | 60             | 150     | 31             | 134    | 119            | 15        | 123             | 83              | 0                      | 83                          | 36                  | 0                   | 0                          | 0                               | 15                    | 244                 |
| FINRISK97             | 6328                | 6.8 (6.0 to 6.9)                          | 220            | 58             | 107     | 33             | 93     | 74             | 19        | 93              | 73              | 0                      | 73                          | 19                  | 0                   | 0                          | 0                               | 15                    | 208                 |
| FRAMOFF               | 2854                | 12.0 (4.7 to 14.4)                        | 125            | 5              | 83      | 4              | 79     | 79             | 0         | 41              | 36              | 0                      | 36                          | 5                   | 0                   | 0                          | 0                               | 0                     | 111                 |
| GOH                   | 2772                | 35.0 (14.4 to 36.0)                       | 268            | 268            | 121     | 121            | 75     | 0              | 75        | 60              | 2               | 2                      | 0                           | 5                   | 27                  | 27                         | 0                               | 58                    | 1025                |
| GOTO13                | 766                 | 23.4 (5.0 to 30.5)                        | 373            | 43             | 216     | 2              | 216    | 214            | 2         | 117             | 0               | 0                      | 0                           | 1                   | 116                 | 0                          | 116                             | 32                    | 253                 |
| GOTO33                | 733                 | 12.8 (5.8 to 13.1)                        | 44             | 22             | 27      | 13             | 23     | 14             | 9         | 8               | 0               | 0                      | 0                           | 0                   | 8                   | 0                          | 8                               | 4                     | 81                  |



| Study     | No. of participants | Median follow-up (5th & 95th percentiles) | All CVD events | All CVD deaths | All CHD | All CHD deaths | All MI | MI (non-fatal) | MI deaths | All CBVD events | Ischaem. stroke | Ischaem. stroke deaths | Ischaem. stroke (non-fatal) | Haemorrhagic stroke | Unclassified stroke | Unclassified stroke deaths | Unclassified stroke (non-fatal) | Other vascular deaths | All-cause mortality |
|-----------|---------------------|-------------------------------------------|----------------|----------------|---------|----------------|--------|----------------|-----------|-----------------|-----------------|------------------------|-----------------------------|---------------------|---------------------|----------------------------|---------------------------------|-----------------------|---------------------|
| GOTO43    | 773                 | 10.0 (7.9 to 10.7)                        | 42             | 4              | 28      | 1              | 28     | 27             | 1         | 12              | 9               | 1                      | 8                           | 1                   | 1                   | 0                          | 1                               | 1                     | 25                  |
| GOTOW     | 1455                | 32.2 (8.9 to 32.7)                        | 369            | 131            | 148     | 54             | 148    | 94             | 54        | 179             | 0               | 0                      | 0                           | 0                   | 179                 | 35                         | 144                             | 0                     | 408                 |
| GREPCO    | 815                 | 7.9 (7.7 to 8.9)                          | 0              | 0              | 0       | 0              | 0      | 0              | 0         | 0               | 0               | 0                      | 0                           | 0                   | 0                   | 0                          | 0                               | 0                     | 5                   |
| GRIPS     | 5786                | 9.8 (4.8 to 10.0)                         | 449            | 47             | 299     | 0              | 299    | 299            | 0         | 103             | 0               | 0                      | 0                           | 0                   | 103                 | 0                          | 103                             | 43                    | 225                 |
| HBS       | 1142                | 20.5 (6.0 to 20.5)                        | 113            | 113            | 75      | 75             | 0      | 0              | 0         | 24              | 0               | 0                      | 0                           | 0                   | 24                  | 24                         | 0                               | 0                     | 359                 |
| HELSINAG  | 527                 | 8.3 (1.7 to 11.0)                         | 135            | 135            | 56      | 56             | 39     | 0              | 39        | 53              | 28              | 28                     | 0                           | 3                   | 4                   | 4                          | 0                               | 17                    | 310                 |
| HISAYAMA  | 2576                | 14.0 (3.2 to 14.0)                        | 356            | 76             | 77      | 10             | 70     | 67             | 3         | 220             | 148             | 1                      | 147                         | 49                  | 0                   | 0                          | 0                               | 27                    | 387                 |
| HONOL     | 2571                | 6.2 (1.4 to 7.6)                          | 318            | 113            | 157     | 42             | 146    | 115            | 31        | 135             | 13              | 13                     | 0                           | 40                  | 75                  | 4                          | 71                              | 15                    | 569                 |
| HOORN     | 2230                | 8.8 (3.7 to 9.9)                          | 172            | 70             | 73      | 13             | 72     | 60             | 12        | 53              | 3               | 3                      | 0                           | 4                   | 46                  | 4                          | 42                              | 44                    | 213                 |
| IKNS      | 8043                | 11.1 (5.1 to 18.6)                        | 495            | 154            | 84      | 47             | 78     | 37             | 41        | 344             | 158             | 21                     | 137                         | 71                  | 90                  | 1                          | 89                              | 63                    | 760                 |
| ISRAEL    | 7838                | 23.3 (7.9 to 23.9)                        | 1001           | 1001           | 733     | 733            | 0      | 0              | 0         | 268             | 0               | 0                      | 0                           | 0                   | 268                 | 268                        | 0                               | 0                     | 2573                |
| KIHD      | 2068                | 20.1 (2.9 to 24.1)                        | 588            | 61             | 406     | 17             | 399    | 389            | 10        | 153             | 111             | 8                      | 103                         | 35                  | 3                   | 0                          | 3                               | 12                    | 348                 |
| MALMO     | 32495               | 18.2 (7.9 to 22.6)                        | 2418           | 1185           | 2047    | 814            | 1686   | 1233           | 453       | 144             | 36              | 36                     | 0                           | 49                  | 17                  | 17                         | 0                               | 94                    | 3290                |
| MATISS83  | 2557                | 18.6 (6.4 to 19.5)                        | 334            | 195            | 82      | 36             | 75     | 46             | 29        | 99              | 26              | 0                      | 26                          | 10                  | 57                  | 2                          | 55                              | 136                   | 410                 |
| MATISS87  | 2113                | 15.6 (7.0 to 16.2)                        | 175            | 95             | 46      | 24             | 44     | 22             | 22        | 58              | 9               | 0                      | 9                           | 8                   | 39                  | 0                          | 39                              | 67                    | 208                 |
| MATISS93  | 1211                | 8.3 (6.8 to 9.3)                          | 32             | 14             | 14      | 3              | 14     | 11             | 3         | 7               | 1               | 0                      | 1                           | 2                   | 3                   | 0                          | 3                               | 11                    | 30                  |
| MCVDRFP   | 23111               | 16.8 (13.6 to 18.9)                       | 454            | 454            | 196     | 196            | 158    | 0              | 158       | 96              | 15              | 15                     | 0                           | 31                  | 32                  | 32                         | 0                               | 86                    | 1770                |
| MESA      | 6760                | 4.8 (2.5 to 5.2)                          | 172            | 21             | 83      | 14             | 69     | 69             | 0         | 83              | 67              | 0                      | 67                          | 13                  | 2                   | 1                          | 1                               | 0                     | 143                 |
| MICOL     | 23196               | 5.9 (4.7 to 7.1)                          | 168            | 168            | 120     | 120            | 68     | 0              | 68        | 36              | 7               | 7                      | 0                           | 3                   | 22                  | 22                         | 0                               | 5                     | 579                 |
| MOGERAUG1 | 874                 | 12.9 (3.6 to 13.4)                        | 108            | 61             | 79      | 32             | 73     | 47             | 26        | 5               | 0               | 0                      | 0                           | 2                   | 2                   | 2                          | 0                               | 19                    | 126                 |
| MOGERAUG2 | 4025                | 7.9 (2.3 to 8.4)                          | 130            | 67             | 105     | 42             | 97     | 63             | 34        | 7               | 1               | 1                      | 0                           | 1                   | 3                   | 3                          | 0                               | 14                    | 203                 |
| MOGERAUG3 | 3398                | 3.0 (1.8 to 3.6)                          | 38             | 27             | 19      | 8              | 17     | 11             | 6         | 5               | 2               | 2                      | 0                           | 1                   | 2                   | 2                          | 0                               | 9                     | 59                  |
| MONFRI86  | 1138                | 16.7 (6.2 to 16.9)                        | 84             | 49             | 24      | 6              | 24     | 18             | 6         | 17              | 8               | 0                      | 8                           | 3                   | 5                   | 0                          | 5                               | 42                    | 133                 |
| MONFRI89  | 1105                | 13.6 (6.7 to 13.7)                        | 63             | 35             | 19      | 4              | 19     | 15             | 4         | 14              | 6               | 0                      | 6                           | 4                   | 4                   | 1                          | 3                               | 28                    | 79                  |
| MONFRI94  | 1296                | 8.5 (7.0 to 8.8)                          | 40             | 13             | 11      | 0              | 11     | 11             | 0         | 17              | 6               | 0                      | 6                           | 7                   | 2                   | 0                          | 2                               | 11                    | 40                  |
| MORGEN    | 17739               | 10.8 (8.5 to 13.1)                        | 150            | 150            | 77      | 77             | 61     | 0              | 61        | 25              | 4               | 4                      | 0                           | 10                  | 4                   | 4                          | 0                               | 24                    | 590                 |
| MOSWEGOT  | 4157                | 12.9 (7.6 to 18.6)                        | 280            | 67             | 143     | 39             | 133    | 104            | 29        | 117             | 66              | 3                      | 63                          | 17                  | 15                  | 1                          | 14                              | 12                    | 235                 |
| MRCOLD    | 10521               | 8.5 (1.1 to 11.7)                         | 2766           | 2766           | 0       | 0              | 0      | 0              | 0         | 0               | 0               | 0                      | 0                           | 0                   | 0                   | 0                          | 0                               | 0                     | 6556                |
| NCS1      | 24238               | 16.1 (14.4 to 16.7)                       | 553            | 553            | 378     | 378            | 287    | 0              | 287       | 67              | 9               | 9                      | 0                           | 17                  | 12                  | 12                         | 0                               | 84                    | 1448                |
| NCS2      | 13106               | 17.3 (15.5 to 17.8)                       | 282            | 282            | 195     | 195            | 154    | 0              | 154       | 27              | 2               | 2                      | 0                           | 6                   | 6                   | 6                          | 0                               | 40                    | 815                 |
| NCS3      | 10179               | 18.2 (12.1 to 18.8)                       | 474            | 474            | 292     | 292            | 217    | 0              | 217       | 88              | 8               | 8                      | 0                           | 25                  | 24                  | 24                         | 0                               | 73                    | 1011                |
| NFR       | 3133                | 10.2 (6.1 to 11.2)                        | 127            | 127            | 93      | 93             | 63     | 0              | 63        | 27              | 2               | 2                      | 0                           | 9                   | 11                  | 11                         | 0                               | 5                     | 340                 |
| NHANESI   | 11621               | 18.4 (4.7 to 21.0)                        | 1939           | 1211           | 1034    | 655            | 740    | 379            | 361       | 547             | 152             | 36                     | 116                         | 55                  | 290                 | 100                        | 190                             | 189                   | 2747                |
| NHANESIII | 12566               | 8.8 (3.4 to 11.8)                         | 883            | 883            | 487     | 487            | 185    | 0              | 185       | 176             | 0               | 0                      | 0                           | 0                   | 176                 | 176                        | 0                               | 111                   | 2086                |

| Study                       | No. of participants | Median follow-up (5th & 95th percentiles) | All CVD events | All CVD deaths | All CHD | All CHD deaths | All MI | MI (non-fatal) | MI deaths | All CBVD events | Ischaem. stroke | Ischaem. stroke deaths | Ischaem. stroke (non-fatal) | Haemorrhagic stroke | Unclassified stroke | Unclassified stroke deaths | Unclassified stroke (non-fatal) | Other vascular deaths | All-cause mortality |
|-----------------------------|---------------------|-------------------------------------------|----------------|----------------|---------|----------------|--------|----------------|-----------|-----------------|-----------------|------------------------|-----------------------------|---------------------|---------------------|----------------------------|---------------------------------|-----------------------|---------------------|
| NPHSII                      | 2968                | 8.3 (3.4 to 10.4)                         | 298            | 57             | 195     | 20             | 192    | 175            | 17        | 73              | 39              | 0                      | 39                          | 7                   | 20                  | 3                          | 17                              | 28                    | 203                 |
| NSHS                        | 1944                | 9.6 (3.3 to 10.0)                         | 109            | 56             | 37      | 37             | 23     | 0              | 23        | 58              | 1               | 1                      | 0                           | 1                   | 55                  | 2                          | 53                              | 14                    | 56                  |
| OSAKA                       | 12307               | 10.2 (3.9 to 18.8)                        | 268            | 108            | 43      | 16             | 37     | 27             | 10        | 148             | 60              | 11                     | 49                          | 27                  | 45                  | 0                          | 45                              | 72                    | 637                 |
| OSLO                        | 17392               | 29.5 (10.9 to 30.5)                       | 2638           | 2638           | 1617    | 1617           | 1101   | 0              | 1101      | 384             | 57              | 57                     | 0                           | 80                  | 172                 | 172                        | 0                               | 443                   | 5944                |
| PARIS1                      | 7079                | 22.9 (7.6 to 26.1)                        | 603            | 603            | 341     | 341            | 0      | 0              | 0         | 100             | 0               | 0                      | 0                           | 0                   | 100                 | 100                        | 0                               | 0                     | 2083                |
| PRHHP                       | 6350                | 8.3 (5.1 to 12.0)                         | 384            | 245            | 213     | 88             | 176    | 125            | 51        | 84              | 54              | 43                     | 11                          | 20                  | 5                   | 5                          | 0                               | 64                    | 597                 |
| PRIME                       | 9582                | 5.2 (5.0 to 7.3)                          | 208            | 37             | 146     | 17             | 141    | 129            | 12        | 42              | 33              | 0                      | 33                          | 6                   | 3                   | 0                          | 3                               | 17                    | 185                 |
| PROCAM                      | 20218               | 9.9 (3.9 to 18.9)                         | 742            | 302            | 486     | 119            | 428    | 367            | 61        | 106             | 77              | 9                      | 68                          | 22                  | 7                   | 7                          | 0                               | 136                   | 1000                |
| QUEBEC                      | 1307                | 5.3 (3.5 to 5.6)                          | 55             | 13             | 35      | 2              | 35     | 33             | 2         | 9               | 0               | 0                      | 0                           | 0                   | 9                   | 0                          | 9                               | 7                     | 51                  |
| RANCHO                      | 1806                | 14.1 (2.0 to 18.1)                        | 515            | 115            | 225     | 3              | 223    | 222            | 1         | 188             | 0               | 0                      | 0                           | 1                   | 178                 | 0                          | 178                             | 41                    | 498                 |
| REYK                        | 16840               | 24.7 (6.3 to 37.1)                        | 4559           | 2526           | 3263    | 1230           | 2900   | 2033           | 867       | 769             | 183             | 183                    | 0                           | 162                 | 244                 | 244                        | 0                               | 344                   | 6717                |
| ROTT                        | 4823                | 12.0 (3.0 to 14.2)                        | 670            | 455            | 250     | 35             | 245    | 215            | 30        | 146             | 39              | 39                     | 0                           | 23                  | 64                  | 64                         | 0                               | 165                   | 1431                |
| SHHEC                       | 10966               | 10.0 (6.9 to 10.0)                        | 520            | 127            | 364     | 98             | 334    | 266            | 68        | 132             | 37              | 0                      | 37                          | 12                  | 63                  | 0                          | 63                              | 13                    | 529                 |
| SHS                         | 4131                | 12.4 (2.0 to 14.3)                        | 784            | 310            | 449     | 147            | 370    | 302            | 68        | 216             | 8               | 8                      | 0                           | 10                  | 192                 | 20                         | 172                             | 61                    | 1157                |
| SPEED                       | 2126                | 16.7 (3.3 to 18.2)                        | 354            | 195            | 253     | 155            | 232    | 98             | 134       | 77              | 66              | 5                      | 61                          | 2                   | 5                   | 5                          | 0                               | 17                    | 478                 |
| TARFS                       | 3535                | 15.6 (4.9 to 18.0)                        | 348            | 286            | 243     | 189            | 79     | 54             | 25        | 65              | 1               | 1                      | 0                           | 0                   | 64                  | 56                         | 8                               | 28                    | 532                 |
| TROMSØ                      | 22568               | 18.8 (5.1 to 19.3)                        | 2138           | 344            | 1143    | 154            | 1095   | 989            | 106       | 829             | 610             | 1                      | 609                         | 101                 | 64                  | 16                         | 48                              | 121                   | 1422                |
| ULSAM                       | 2280                | 27.9 (6.5 to 35.9)                        | 995            | 251            | 592     | 146            | 515    | 446            | 69        | 316             | 195             | 2                      | 193                         | 56                  | 41                  | 3                          | 38                              | 51                    | 855                 |
| VHMPP                       | 66395               | 9.9 (1.3 to 13.7)                         | 1191           | 1191           | 647     | 647            | 289    | 0              | 289       | 239             | 26              | 26                     | 0                           | 40                  | 133                 | 133                        | 0                               | 139                   | 2568                |
| VITA                        | 9031                | 3.3 (1.7 to 5.3)                          | 66             | 21             | 38      | 8              | 37     | 30             | 7         | 19              | 15              | 0                      | 15                          | 2                   | 1                   | 1                          | 0                               | 7                     | 87                  |
| WHITEI                      | 4013                | 8.2 (2.0 to 8.4)                          | 471            | 471            | 217     | 217            | 96     | 0              | 96        | 140             | 20              | 20                     | 0                           | 14                  | 73                  | 73                         | 0                               | 85                    | 1234                |
| WHITEII                     | 10191               | 12.4 (4.8 to 14.1)                        | 346            | 93             | 315     | 62             | 292    | 253            | 39        | 10              | 2               | 2                      | 0                           | 2                   | 4                   | 4                          | 0                               | 10                    | 328                 |
| WHS                         | 28022               | 10.2 (8.4 to 10.8)                        | 622            | 96             | 249     | 10             | 243    | 239            | 4         | 291             | 244             | 0                      | 244                         | 26                  | 2                   | 0                          | 2                               | 53                    | 642                 |
| ZARAGOZA                    | 3662                | 5.1 (4.0 to 5.1)                          | 127            | 37             | 59      | 21             | 59     | 38             | 21        | 68              | 16              | 16                     | 0                           | 0                   | 52                  | 0                          | 52                              | 0                     | 39                  |
| ZUTE                        | 390                 | 8.6 (1.1 to 10.1)                         | 124            | 56             | 57      | 20             | 51     | 37             | 14        | 39              | 1               | 1                      | 0                           | 1                   | 34                  | 3                          | 31                              | 25                    | 160                 |
| <i>Case-control studies</i> |                     |                                           |                |                |         |                |        |                |           |                 |                 |                        |                             |                     |                     |                            |                                 |                       |                     |
| USPHS                       | 934                 | -                                         | 0              | 0              | 244     | 22             | 244    | 221            | 22        | 0               | 153             | 5                      | 147                         | 0                   | 0                   | 0                          | 0                               | 0                     | 0                   |
| EPICNOR                     | 1422                | 7.1 (2.2 to 9.3)                          | 0              | 0              | 480     | 223            | 261    | 257            | 4         | 0               | 0               | 0                      | 0                           | 0                   | 0                   | 0                          | 0                               | 0                     | 0                   |
| FIA                         | 2624                | 4.0 (0.5 to 9.3)                          | 0              | 0              | 600     | 135            | 600    | 465            | 135       | 0               | 0               | 0                      | 0                           | 0                   | 0                   | 0                          | 0                               | 0                     | 0                   |
| FLETCHER                    | 477                 | 5.5 (1.8 to 6.4)                          | 0              | 0              | 144     | 0              | 0      | 0              | 0         | 0               | 0               | 0                      | 0                           | 0                   | 0                   | 0                          | 0                               | 0                     | 0                   |
| HPFS                        | 736                 | 6.0 (1.2 to 6.0)                          | 0              | 0              | 218     | 32             | 197    | 186            | 11        | 0               | 0               | 0                      | 0                           | 0                   | 0                   | 0                          | 0                               | 0                     | 0                   |
| NHS                         | 717                 | 8.0 (1.4 to 8.8)                          | 0              | 0              | 239     | 27             | 239    | 212            | 27        | 0               | 0               | 0                      | 0                           | 0                   | 0                   | 0                          | 0                               | 0                     | 0                   |
| <i>Clinical trials</i>      |                     |                                           |                |                |         |                |        |                |           |                 |                 |                        |                             |                     |                     |                            |                                 |                       |                     |
| AFTCAPS                     | 6577                | 5.1 (4.3 to 6.7)                          | 190            | 26             | 146     | 4              | 146    | 142            | 4         | 23              | 22              | 0                      | 22                          | 0                   | 1                   | 1                          | 0                               | 12                    | 57                  |

| Study                                                               | No. of participants | Median follow-up (5th & 95th percentiles) | All CVD events | All CVD deaths | All CHD | All CHD deaths | All MI | MI (non-fatal) | MI deaths | All CBVD events | Ischaem. stroke | Ischaem. stroke deaths | Ischaem. stroke (non-fatal) | Haemorrhagic stroke | Unclassified stroke | Unclassified stroke deaths | Unclassified stroke (non-fatal) | Other vascular deaths | All-cause mortality |
|---------------------------------------------------------------------|---------------------|-------------------------------------------|----------------|----------------|---------|----------------|--------|----------------|-----------|-----------------|-----------------|------------------------|-----------------------------|---------------------|---------------------|----------------------------|---------------------------------|-----------------------|---------------------|
| ALLHAT                                                              | 28146               | 4.4 (0.8 to 6.7)                          | 1669           | 6              | 1126    | 5              | 1126   | 1121           | 5         | 543             | 0               | 0                      | 0                           | 0                   | 543                 | 1                          | 542                             | 0                     | 11                  |
| LEADER                                                              | 941                 | 4.2 (0.8 to 6.2)                          | 182            | 95             | 99      | 63             | 79     | 36             | 43        | 67              | 52              | 7                      | 45                          | 3                   | 12                  | 6                          | 6                               | 11                    | 184                 |
| MRFIT                                                               | 12840               | 6.9 (4.4 to 7.8)                          | 896            | 256            | 767     | 184            | 711    | 583            | 128       | 80              | 5               | 5                      | 0                           | 4                   | 61                  | 4                          | 57                              | 26                    | 484                 |
| PROSPER                                                             | 3253                | 3.2 (1.1 to 3.8)                          | 395            | 88             | 266     | 65             | 201    | 201            | 0         | 115             | 0               | 0                      | 0                           | 0                   | 115                 | 9                          | 106                             | 0                     | 243                 |
| WOSCOPS                                                             | 6214                | 4.8 (2.9 to 6.0)                          | 452            | 80             | 371     | 71             | 300    | 300            | 0         | 72              | 0               | 0                      | 0                           | 0                   | 72                  | 0                          | 72                              | 0                     | 185                 |
| <i>Studies with information on history of diabetes at baseline*</i> |                     |                                           |                |                |         |                |        |                |           |                 |                 |                        |                             |                     |                     |                            |                                 |                       |                     |
| <b>TOTAL (97 studies)</b>                                           | 592830              | 11.1 (3.2 to 25.9)                        | 49086          | 25989          | 28856   | 12598          | 23247  | 16113          | 7133      | 12471           | 4649            | 681                    | 3967                        | 1466                | 5522                | 2044                       | 3478                            | 4438                  | 72100               |
| <i>Studies with information on fasting glucose concentration†</i>   |                     |                                           |                |                |         |                |        |                |           |                 |                 |                        |                             |                     |                     |                            |                                 |                       |                     |
| <b>TOTAL (54 studies)</b>                                           | 288483              | 10.5 (2.1 to 26.1)                        | 23862          | 11659          | 15120   | 6289           | 12371  | 8831           | 3540      | 5755            | 1924            | 399                    | 1525                        | 684                 | 2670                | 987                        | 1683                            | 1921                  | 31882               |
| <i>All studies</i>                                                  |                     |                                           |                |                |         |                |        |                |           |                 |                 |                        |                             |                     |                     |                            |                                 |                       |                     |
| <b>TOTAL (102 studies)</b>                                          | 698782              | 10.8 (2.8 to 25.6)                        | 52765          | 28964          | 31288   | 14406          | 24848  | 16737          | 8110      | 13113           | 4754            | 768                    | 3985                        | 1546                | 5879                | 2337                       | 3542                            | 4766                  | 78853               |

CVD indicates cardiovascular disease; CBVD cerebrovascular disease.

\*2 studies provided data on history of diabetes but were not included in the analyses of diabetes because none of the participants (MRFIT) and all of the participants with history of diabetes information (HBS) had diabetes. 3 studies (HELSINAG, VITA and VHMPP) did not provide data on history of diabetes.

†48 studies did not provide information on fasting glucose concentration.

**eTable 5 Hazard ratios for coronary heart disease in people with diabetes compared with people without diabetes, progressively adjusted for baseline levels of several risk factors.**

(a) Adjusted for conventional risk factors.

| With adjustment for ...                   | Data from studies with complete information on sex, age, smoking, BMI, SBP, HDL-C, non-HDL-C and triglycerides |          |                  |                                     |                         |
|-------------------------------------------|----------------------------------------------------------------------------------------------------------------|----------|------------------|-------------------------------------|-------------------------|
|                                           | HR (95% CI)                                                                                                    | $\chi^2$ | Q statistic (df) | P for heterogeneity between studies | I <sup>2</sup> (95% CI) |
| <i>264 353 participants; 11 848 cases</i> |                                                                                                                |          |                  |                                     |                         |
| Age                                       | 2.06 (1.82, 2.34)                                                                                              | 127      | 206 (60)         | <0.0001                             | 71(62-78)               |
| Plus smoking                              | 2.10 (1.85, 2.39)                                                                                              | 134      | 202 (60)         | <0.0001                             | 70(62-77)               |
| Plus BMI                                  | 2.00 (1.78, 2.25)                                                                                              | 131      | 173 (60)         | <0.0001                             | 65(55-74)               |
| Plus SBP                                  | 1.91 (1.70, 2.14)                                                                                              | 119      | 163 (60)         | <0.0001                             | 63(52-72)               |
| Plus non-HDL-C                            | 1.93 (1.71, 2.16)                                                                                              | 123      | 163 (60)         | <0.0001                             | 63(51-72)               |
| Plus HDL-C                                | 1.87 (1.67, 2.09)                                                                                              | 119      | 149 (60)         | <0.0001                             | 60(47-70)               |
| Plus log-triglycerides                    | 1.87 (1.67, 2.09)                                                                                              | 120      | 146 (60)         | <0.0001                             | 59(45-69)               |

(b) Adjusted for conventional risk factors and apolipoproteins.

| With adjustment for ...          | Data from studies with complete information on sex, age, smoking, BMI, SBP, HDL-C, non-HDL-C and triglycerides |           |                  |                                     |                         |
|----------------------------------|----------------------------------------------------------------------------------------------------------------|-----------|------------------|-------------------------------------|-------------------------|
|                                  | HR (95% CI)                                                                                                    | $\chi^2$  | Q statistic (df) | P for heterogeneity between studies | I <sup>2</sup> (95% CI) |
| <i>87 702 participants; 4998</i> |                                                                                                                |           |                  |                                     |                         |
| Age                              | 2.42 (1.91, 3.08)                                                                                              | 53        | 116 (21)         | <0.0001                             | 82(74-88)               |
| Plus smoking                     | 2.47 (1.95, 3.13)                                                                                              | 57        | 111 (21)         | <0.0001                             | 81(72-87)               |
| Plus BMI                         | 2.29 (1.82, 2.87)                                                                                              | 51        | 98 (21)          | <0.0001                             | 78(68-86)               |
| Plus SBP                         | 2.16 (1.73, 2.70)                                                                                              | 46        | 92 (21)          | <0.0001                             | 77(66-85)               |
| <b>Plus Apo-B</b>                | <b>2.19 (1.77, 2.71)</b>                                                                                       | <b>53</b> | <b>82 (21)</b>   | <b>&lt;0.0001</b>                   | <b>74(61-83)</b>        |
| <b>Plus Apo-A1</b>               | <b>2.11 (1.71, 2.61)</b>                                                                                       | <b>48</b> | <b>81 (21)</b>   | <b>&lt;0.0001</b>                   | <b>74(60-83)</b>        |
| Plus log-triglycerides           | 2.08 (1.69, 2.55)                                                                                              | 48        | 75 (21)          | <0.0001                             | 72(57-82)               |

(c) Adjusted for conventional risk factors and waist-to-hip ratio (WHR).

| With adjustment for ...                | Data from studies with complete information on sex, age, smoking, BMI, SBP, HDL-C, non-HDL-C and triglycerides |           |                  |                                     |                         |
|----------------------------------------|----------------------------------------------------------------------------------------------------------------|-----------|------------------|-------------------------------------|-------------------------|
|                                        | HR (95% CI)                                                                                                    | $\chi^2$  | Q statistic (df) | P for heterogeneity between studies | I <sup>2</sup> (95% CI) |
| <i>90 335 participants; 4552 cases</i> |                                                                                                                |           |                  |                                     |                         |
| Age                                    | 2.07 (1.76, 2.45)                                                                                              | 75        | 59 (23)          | <0.0001                             | 61(39-75)               |
| Plus smoking                           | 2.12 (1.80, 2.51)                                                                                              | 78        | 60 (23)          | <0.0001                             | 61(40-75)               |
| <b>Plus WHR</b>                        | <b>1.99 (1.72, 2.31)</b>                                                                                       | <b>85</b> | <b>45 (23)</b>   | <b>0.0038</b>                       | <b>49(18-68)</b>        |
| Plus SBP                               | 1.87 (1.62, 2.17)                                                                                              | 71        | 44 (23)          | 0.0049                              | 48(16-68)               |
| Plus non-HDL-C                         | 1.88 (1.62, 2.18)                                                                                              | 68        | 46 (23)          | 0.0029                              | 50(20-69)               |
| Plus HDL-C                             | 1.81 (1.57, 2.09)                                                                                              | 66        | 42 (23)          | 0.0088                              | 45(12-66)               |
| Plus log-triglycerides                 | 1.83 (1.59, 2.12)                                                                                              | 68        | 41 (23)          | 0.0109                              | 44(10-66)               |

(d) Adjusted for other vascular risk factors.

| With adjustment for ...   | No. of participants | No. of events | HR (95% CI)       | Wald $\chi^2$ |
|---------------------------|---------------------|---------------|-------------------|---------------|
| Conventional risk factors | 129 569             | 6139          | 2.00 (1.69, 2.37) | 64.7          |
| Plus fibrinogen           | 129 569             | 6139          | 1.95 (1.65, 2.29) | 63.6          |
| Conventional risk factors | 80 563              | 4631          | 1.93 (1.61, 2.32) | 50.2          |
| Plus log-CRP              | 80 563              | 4631          | 1.90 (1.59, 2.28) | 49.4          |
| Conventional risk factors | 144 998             | 7541          | 1.81 (1.57, 2.09) | 64.8          |
| Plus eGFR                 | 144 998             | 7541          | 1.81 (1.57, 2.10) | 64.4          |
| Conventional risk factors | 96 524              | 5641          | 1.65 (1.45, 1.90) | 53.1          |
| Plus fasting glucose      | 96 524              | 5641          | 1.54 (1.35, 1.75) | 42.4          |

Conventional risk factors included age, smoking status, BMI, systolic blood pressure, non-HDL-C, HDL-C and log triglycerides. Studies with fewer than 11 events for an outcome were excluded from the analysis of that outcome. All regression analyses were stratified, where appropriate, by sex and trial group.

**eTable 6 Change in metrics of vascular disease risk prediction upon addition of history of diabetes or fasting glucose concentration to a reference model containing conventional risk factors**

| Covariate added to reference model                      | Increment in C-index (95% CI)       | Net reclassification improvement (95% CI) | Integrated discrimination improvement (95% CI) |
|---------------------------------------------------------|-------------------------------------|-------------------------------------------|------------------------------------------------|
| Diabetes                                                | 0.0081 (0.0065, 0.0098)<br>P<0.0001 | 0.0584 (0.0461, 0.0708)<br>P<0.0001       | 0.0065(0.0052, 0.0078)<br>P<0.0001             |
| IFG in people without diabetes                          | 0.0000 (-0.0000, 0.0001)<br>P=0.243 | -0.0050 (-0.0012, 0.0020)<br>P=0.180      | 0.00001 (0.000006, 0.000013)<br>P<0.0001       |
| Fasting glucose <sup>‡</sup> in people without diabetes | 0.0002 (-0.0002, 0.0007)<br>P=0.256 | -0.0018 (-0.0080, 0.0044)<br>P=0.571      | 0.0004 (0.0001, 0.0007)<br>P=0.015             |

Vascular disease was defined as first-ever fatal or non-fatal coronary heart disease or cerebrovascular outcome. The reference model with conventional risk factors (stratified by sex) included age, smoking status, systolic blood pressure, total cholesterol and HDL cholesterol. People were classified as having diabetes based on self-report or fasting glucose  $\geq 7$  mmol/L. Impaired fasting glucose (IFG) was defined by ADA criteria (5.6-7 mmol/L)

<sup>‡</sup> To accommodate for a non-linear association, fasting glucose concentration was entered as a categorical variable (categories: <4, 4-4.5, 4.5-5, 5-5.5, 5.5-6, 6-6.5 and 6.5-7 mmol/L)

Assessments of the C-index were restricted to 112 913 participants (9973 cases) with information on both history of diabetes and fasting glucose concentration. Of these, 94 268 participants (7860 cases) did not have diabetes at baseline (and contributed to the analyses of fasting glucose). Assessments of net reclassification improvement and integrated discrimination improvement were restricted to 36 093 participants (3865 cases) with information on both history of diabetes and fasting glucose concentration and followed up for at least 10 years. Of these, 31 821 participants (2952 cases) did not have diabetes at baseline and contributed to the analyses of fasting glucose. Only studies recording both fatal and non-fatal events contributed to the reclassification analyses.

**eTable 7 Hazard ratios for coronary heart disease and ischaemic stroke in people with diabetes at baseline compared with people without diabetes, progressively adjusted for usual levels of conventional risk factors**

| With adjustment for ...       | Data from studies with complete information on sex, age, smoking, BMI, SBP, HDL-C, non-HDL-C and triglycerides |          |                  |                                     |                         |
|-------------------------------|----------------------------------------------------------------------------------------------------------------|----------|------------------|-------------------------------------|-------------------------|
|                               | HR (95% CI)                                                                                                    | $\chi^2$ | Q statistic (df) | P for heterogeneity between studies | I <sup>2</sup> (95% CI) |
| <b>Coronary heart disease</b> | <i>264 353 participants; 11 848</i>                                                                            |          |                  |                                     |                         |
| Age                           | 2.06 (1.82, 2.34)                                                                                              | 126.7    | 206 (60)         | <0.0001                             | 71 (62-77)              |
| Plus smoking                  | 2.06 (1.82, 2.34)                                                                                              | 125.7    | 206 (60)         | <0.0001                             | 71 (62-78)              |
| Plus BMI                      | 2.01 (1.78, 2.27)                                                                                              | 127.1    | 185 (60)         | <0.0001                             | 68 (58-75)              |
| Plus SBP                      | 1.87 (1.66, 2.09)                                                                                              | 114.4    | 160 (60)         | <0.0001                             | 62 (50-71)              |
| Plus non-HDL-C                | 1.93 (1.72, 2.17)                                                                                              | 124.1    | 162 (60)         | <0.0001                             | 63 (51-72)              |
| Plus HDL-C                    | 1.84 (1.65, 2.05)                                                                                              | 117.9    | 143 (60)         | <0.0001                             | 58 (44-68)              |
| Plus log-triglycerides        | 1.83 (1.64, 2.04)                                                                                              | 116.3    | 139 (60)         | <0.0001                             | 57 (42-68)              |
| <b>Ischaemic stroke</b>       | <i>157 315 participants; 2858 cases</i>                                                                        |          |                  |                                     |                         |
| Age                           | 2.56 (2.15, 3.05)                                                                                              | 112.4    | 47 (25)          | 0.0047                              | 47 (16-66)              |
| Plus smoking                  | 2.58 (2.16, 3.09)                                                                                              | 108.5    | 49 (25)          | 0.0025                              | 49 (20-68)              |
| Plus BMI                      | 2.51 (2.12, 2.96)                                                                                              | 116.8    | 43 (25)          | 0.0150                              | 41 (7-63)               |
| Plus SBP                      | 2.22 (1.90, 2.59)                                                                                              | 101.1    | 37 (25)          | 0.0542                              | 33 (0-58)               |
| Plus non-HDL-C                | 2.23 (1.91, 2.60)                                                                                              | 102.1    | 37 (25)          | 0.0572                              | 33 (0-58)               |
| Plus HDL-C                    | 2.19 (1.89, 2.53)                                                                                              | 108.6    | 34 (25)          | 0.1158                              | 26 (0-54)               |
| Plus log-triglycerides        | 2.18 (1.89, 2.52)                                                                                              | 113.8    | 32 (25)          | 0.1579                              | 22 (0-52)               |

Note: Studies with fewer than 11 events for an outcome were excluded from the analysis of that outcome. All regression analyses were stratified, where appropriate, by sex and trial group.

**eTable 8      Population attributable fraction for vascular death associated with diabetes**

| Prevalence of diabetes among cases | Population attributable fraction (95% CI) |
|------------------------------------|-------------------------------------------|
| 11.5% (observed)                   | 5.3% (4.6%, 5.9%)                         |
| <i>Hypothetical examples</i>       |                                           |
| 20%                                | 10.8% (10%, 11.7%)                        |
| 40%                                | 21.7% (19.9%, 23.4%)                      |

The observed diabetes prevalence among cases of 11.5% (10.0% - 12.9%) corresponds to diabetes prevalence in the general population of 7.0% (6.1% - 7.9%). Regression analyses were stratified, where appropriate, by sex and trial group, and adjusted for age, smoking status, BMI and systolic blood pressure. Overall population attributable fractions (PAF) presented were calculated by random effects meta-analysis of study specific PAFs. Study specific PAFs were calculated using the formula:  $PAF = Pe * (RR-1) / RR$ , where Pe is the exposure prevalence among cases and RR is the relative risk.

**eTable 9 Population attributable fraction for vascular death associated with diabetes, after making allowances for misclassification in diabetes status**

|                                        | Prevalence of diabetes among cases |                     |                      |
|----------------------------------------|------------------------------------|---------------------|----------------------|
|                                        | 10%                                | 20%                 | 30%                  |
| Baseline                               | 5.0% (4.5%, 5.5%)                  | 10.0% (9.0%, 10.9%) | 15.0% (13.5%, 16.4%) |
| Incident rate of diabetes (% per year) |                                    |                     |                      |
| 0%                                     | 4.7% (4.2%, 5.2%)                  | 9.4% (8.4%, 10.3%)  | 14.2% (12.7%, 15.5%) |
| 0.1%                                   | 4.8% (4.3%, 5.2%)                  | 9.6% (8.6%, 10.5%)  | 14.3% (12.9%, 15.7%) |
| 0.3%                                   | 4.9% (4.4%, 5.3%)                  | 9.8% (8.8%, 10.7%)  | 14.7% (13.2%, 16.0%) |
| 0.5%                                   | 5.0% (4.5%, 5.4%)                  | 10.0% (9.1%, 10.9%) | 15% (13.6%, 16.3%)   |
| 1%                                     | 5.3% (4.8%, 5.7%)                  | 10.5% (9.6%, 11.4%) | 15.8% (14.4%, 17.0%) |
| 1.5%                                   | 5.5% (5.0%, 5.9%)                  | 11.0% (10%, 11.8%)  | 16.5% (15%, 17.7%)   |

Analyses used HRs estimated from analyses of time dependent diabetes status described in eFigure 13.



## **eAppendix 1.** List of studies' acronyms

**AFTCAPS**, Air Force/Texas Coronary Atherosclerosis Prevention Study  
**ALLHAT**, Antihypertensive and Lipid-Lowering Treatment to Prevent Heart Attack Trial  
**ARIC**, Atherosclerosis Risk in Communities Study  
**ATENA**, cohort of Progetto CUORE  
**ATTICA**, ATTICA Study  
**BHS**, Busselton Health Study  
**BRHS**, British Regional Heart Study  
**BRUN**, Bruneck Study  
**BUPA**, BUPA Study  
**BWHHS**, British Women's Heart and Health Study  
**CaPS**, Caerphilly Prospective Study  
**CASTEL**, Cardiovascular Study in the Elderly  
**CHARL**, Charleston Heart Study  
**CHS-1**, cohort of Cardiovascular Health Study (CHS)  
**CHS-2**, cohort of Cardiovascular Health Study (CHS)  
**COPE**, Copenhagen City Heart Study  
**CUORE**, Progetto CUORE  
**DISCO**, District of Sezze Chronic Disease Control Programme, cohort of Risk Factors and Life Expectancy Pooling Project (RIFLE)  
**DRECE**, Diet and Risk of Cardiovascular Disease in Spain  
**DUBBO**, Dubbo Study of the Elderly  
**EMOFRI**, cohort of Progetto CUORE  
**EPESEBOS**, The Established Populations for the Epidemiologic Study of the Elderly Studies, Boston  
**EPESEIOW**, The Established Populations for the Epidemiologic Study of the Elderly Studies, Iowa  
**EPESENCA**, The Established Populations for the Epidemiologic Study of the Elderly Studies, North Carolina  
**EPESENHA**, The Established Populations for the Epidemiologic Study of the Elderly Studies, New Haven  
**EPICNOR**, EPIC Norfolk Study  
**ESTHER**, Epidemiologische Studie zu Chancen der Verhütung, Früherkennung und Therapie chronischer Erkrankungen in der älteren Bevölkerung  
**FIA**, First myocardial infarction in Northern Sweden  
**FINE-FIN**, Finland, Italy and Netherlands Elderly Study - Finland cohort  
**FINE-IT**, Finland, Italy and Netherlands Elderly Study – Italian cohort  
**FINRISK-92**, Finrisk Cohort 1992  
**FINRISK-97**, Finrisk Cohort 1997  
**FLETCHER**, Fletcher Challenge Blood Study  
**FRAMOFF**, Framingham Offspring Study  
**GLOSTRUP**, Glostrup Study  
**GOH**, The Glucose Intolerance, Obesity and Hypertension Study  
**GOTO13**, Göteborg 1913 Study  
**GOTO33**, Göteborg 1933 Study  
**GOTO43**, Göteborg 1943 Study  
**GOTOW**, Population Study of Women in Gothenburg, Sweden  
**GREPCO**, cohort of Risk Factors and Life Expectancy Pooling Project (RIFLE)  
**GRIPS**, Göttingen Risk Incidence and Prevalence Study  
**HBS**, Helsinki Businessmen Study  
**HELSINAG**, Helsinki Aging Study  
**HISAYAMA**, Hisayama Study  
**HONOL**, Honolulu Heart Program  
**HOORN**, Hoorn Study  
**HPFS**, Health Professionals Follow-up Study  
**IKNS**, Ikawa, Kyowa, and Noichi Study  
**ISRAEL**, Israeli Ischaemic Heart Disease Study  
**KIHD**, Kuopio Ischaemic Heart Disease Study  
**LASA**, Longitudinal Aging Study Amsterdam  
**LEADER**, Lower Extremity Arterial Disease Event Reduction Trial  
**MALMO**, Malmö Preventative Project  
**MATISS-83**, cohort of Progetto CUORE  
**MATISS-87**, cohort of Progetto CUORE  
**MATISS-93**, cohort of Progetto CUORE  
**MCVDRFP**, Monitoring of CVD Risk Factors Project  
**MESA**, Multi-ethnic Study of Atherosclerosis  
**MICOL**, cohort of Risk Factors and Life Expectancy Pooling Project (RIFLE)  
**MOGERAUG1**, MONICA/KORA Augsburg Surveys S1

**MOGERAUG2**, MONICA/KORA Augsburg Surveys S2  
**MOGERAUG3**, MONICA/KORA Augsburg Surveys S3  
**MONFRI-86**, cohort of Progetto CUORE  
**MONFRI-89**, cohort of Progetto CUORE  
**MONFRI-94**, cohort of Progetto CUORE  
**MORGEN**, Monitoring Project on Chronic Disease Risk Factors  
**MOSWEGOT**, MONICA Göteborg Study  
**MRCOLD**, MRC Study of Older People  
**MRFIT**, Multiple Risk Factor Intervention Trial 1  
**NCS 1, 2 and 3**, Norwegian Counties Studies  
**NFR**, cohort of Risk Factors and Life Expectancy Pooling Project (RIFLE)  
**NHANES I**, First National Health and Nutrition Examination Survey  
**NHANES III**, Third National Health and Nutrition Examination Survey  
**NHS**, Nurses' Health Study  
**NORTH KARELIA**, North Karelia Project  
**NPHSII**, Northwick Park Heart Study II  
**NSHS**, Nova Scotia Health Survey  
**OSAKA**, Osaka Study  
**OSLO**, Oslo Study  
**PARIS1**, Paris Prospective Study I  
**PREVEND**, Prevention of Renal and Vascular Endstage Disease Study  
**PRHHP**, Puerto Rico Heart Health Program  
**PRIME**, Prospective Epidemiological Study of Myocardial Infarction  
**PROCAM**, Prospective Cardiovascular Münster Study  
**PROSPER**, Prospective Study of Pravastatin in the Elderly at Risk  
**QUEBEC**, Quebec Cardiovascular Study  
**RANCHO**, Rancho Bernardo Study  
**REYK**, Reykjavik Study  
**RIFLE**, Risk Factors and Life Expectancy Pooling Project  
**ROTT**, The Rotterdam Study  
**SHHEC**, Scottish Heart Health Extended Cohort  
**SHS**, Strong Heart Study  
**SPEED**, Speedwell Study  
**TARFS**, Turkish Adult Risk Factor Study  
**TROMSØ**, Tromsø Study  
**ULSAM**, Uppsala Longitudinal Study of Adult Men  
**USPHS**, U.S. Physicians Health Study  
**USPHS2**, U.S. Physicians Health Study 2  
**VHMPP**, Vorarlberg Health Monitoring and Promotion Programme  
**VITA**, Vicenza Thrombophilia and Atherosclerosis Project  
**WHI-HaBPS**, Women's Health Initiative – Hormones and Biomarkers Preventing Stroke Study  
**WHITE I**, Whitehall I Study  
**WHITE II**, Whitehall II Study  
**WHS**, Womens Health Study  
**WOSCOPS**, West of Scotland Coronary Prevention Study  
**ZARAGOZA**, Zaragoza study  
**ZUTE**, Zutphen Elderly Study

Reference list of participating studies (84 references represent the 109 studies that provided data relevant to these analyses)

1. Gotto AM, Jr., Whitney E, Stein EA et al. Relation between baseline and on-treatment lipid parameters and first acute major coronary events in the Air Force/Texas Coronary Atherosclerosis Prevention Study (AFCAPS/TexCAPS). *Circulation* 2000; **101(5)**:477-484.
2. Whelton PK, Barzilay J, Cushman WC et al. Clinical outcomes in antihypertensive treatment of type 2 diabetes, impaired fasting glucose concentration, and normoglycemia: Antihypertensive and Lipid-Lowering Treatment to Prevent Heart Attack Trial (ALLHAT). *Arch Intern Med* 2005; **165(12)**:1401-1409.
3. Folsom AR, Szklo M, Stevens J, Liao F, Smith R, Eckfeldt JH. A prospective study of coronary heart disease in relation to fasting insulin, glucose, and diabetes. The Atherosclerosis Risk in Communities (ARIC) Study. *Diabetes Care* 1997; **20(6)**:935-942.

4. Panagiotakos DB, Pitsavos C, Skoumas Y, Lentzas Y, Stefanadis C. Five-year incidence of type 2 diabetes mellitus among cardiovascular disease-free Greek adults: findings from the ATTICA study. *Vasc Health Risk Manag* 2008; **4(3)**:691-698.
5. Palmieri L, Donfrancesco C, Giampaoli S et al. Favorable cardiovascular risk profile and 10-year coronary heart disease incidence in women and men: results from the Progetto CUORE. *Eur J Cardiovasc Prev Rehabil* 2006; **13(4)**:562-570.
6. Knuiman MW, Vu HT. Prediction of coronary heart disease mortality in Busselton, Western Australia: an evaluation of the Framingham, national health epidemiologic follow up study, and WHO ERICA risk scores. *J Epidemiol Community Health* 1997; **51(5)**:515-519.
7. Pocock SJ, Shaper AG, Phillips AN. Concentrations of high density lipoprotein cholesterol, triglycerides, and total cholesterol in ischaemic heart disease. *BMJ* 1989; **298(6679)**:998-1002.
8. Kiechl S, Willeit J. The Natural Course of Atherosclerosis: Part I: Incidence and Progression. *Arterioscler Thromb Vasc Biol* 1999; **19(6)**:1484-1490.
9. Wald NJ, Law M, Watt HC et al. Apolipoproteins and ischaemic heart disease: implications for screening. *Lancet* 1994; **343(8889)**:75-79.
10. Lawlor DA, Bedford C, Taylor M, Ebrahim S. Geographical variation in cardiovascular disease, risk factors, and their control in older women: British Women's Heart and Health Study. *J Epidemiol Community Health* 2003; **57(2)**:134-140.
11. Bainton D, Miller NE, Bolton CH et al. Plasma triglyceride and high density lipoprotein cholesterol as predictors of ischaemic heart disease in British men. The Caerphilly and Speedwell Collaborative Heart Disease Studies. *Br Heart J* 1992; **68(1)**:60-66.
12. Casiglia E, Pauletto P, Mazza A et al. Impaired glucose tolerance and its co-variates among 2079 non-diabetic elderly subjects. Ten-year mortality and morbidity in the CASTEL study. *CARDIOVASCULAR STUDY IN THE ELDERLY. Acta Diabetol* 1996; **33(4)**:284-290
13. Nietert PJ, Sutherland SE, Keil JE, Bachman DL. Demographic and biologic influences on survival in whites and blacks: 40 years of follow-up in the Charleston Heart Study. *Int J Equity Health* 2006; **5**:8.
14. Smith NL, Barzilay JI, Kronmal R, Lumley T, Enquobahrie D, Psaty BM. New-onset diabetes and risk of all-cause and cardiovascular mortality: the Cardiovascular Health Study. *Diabetes Care* 2006; **29(9)**:2012-2017.
15. Benn M, Nordestgaard BG, Jensen GB, Tybjaerg-Hansen A. Improving prediction of ischemic cardiovascular disease in the general population using apolipoprotein B: the Copenhagen City Heart Study. *Arterioscler Thromb Vasc Biol* 2007; **27(3)**:661-70.
16. Urbinati GC, Angelico F, Del Ben M, Giampaoli S, Menotti A, Ricci G, Savocchi P, Seccareccia F, Spitoni M, Volpe R. Strong association of overweight to high blood pressure in a rural community of central Italy: the 'Di.S.Co.' Project. *Diabetes Res Clin Pract.* 1990; **10 Suppl 1**:S205-9.
17. Ballesteros-Pomar MD, Rubio-Herrera MA, Gutierrez-Fuentes JA et al. Dietary Habits and Cardiovascular Risk in the Spanish Population: The DRECE Study (I). *Annals of Nutrition and Metabolism* 2000; **44(3)**:108-114.
18. Simons LA, Simons J, Friedlander Y, McCallum J. Usefulness of fasting plasma glucose to predict mortality or coronary heart disease in persons > or = 60 years of age without diabetes mellitus or in those with undiagnosed diabetes mellitus (from The Dubbo Study). *Am J Cardiol* 2008; **102(7)**:831-834.
19. Cornoni-Huntley J, Ostfeld AM, Taylor JO et al. Established populations for epidemiologic studies of the elderly: study design and methodology. *Aging (Milano)* 1993; **5(1)**:27-37.
20. van der Steeg WA, Boekholdt SM, Stein EA et al. Role of the apolipoprotein B-apolipoprotein A-I ratio in cardiovascular risk assessment: a case-control analysis in EPIC-Norfolk. *Ann Intern Med* 2007; **146(9)**:640-648.
21. Raum E, Lietzau S, Stegmaier C, Brenner H, Rothenbacher D. For the majority of patients with diabetes blood pressure and lipid management is not in line with recommendations. Results from a large population-based cohort in Germany. *Pharmacoepidemiol Drug Saf* 2008; **17(5)**:485-494.
22. Laakso M. Glycemic control and the risk for coronary heart disease in patients with non-insulin-dependent diabetes mellitus. The Finnish studies. *Ann Intern Med* 1996; **124(1 Pt 2)**:127-130.

23. Menotti A, Mulder I, Nissinen A et al. Cardiovascular risk factors and 10-year all-cause mortality in elderly European male populations. The FINE study. *Eur Heart J* 2001; **22(7)**:573-579.
24. Vartiainen E, Jousilahti P, Alfthan G, Sundvall J, Pietinen P, Puska P. Cardiovascular risk factor changes in Finland, 1972-1997. *Int J Epidemiol* 2000; **29(1)**:49-56.
25. MacMahon S, Norton R, Jackson R, Mackie MJ, Cheng A, Vander HS, et al. Fletcher Challenge-University of Auckland Heart & Health Study: design and baseline findings. *N Z Med J* 1995;**108(1013)**:499–502.
26. Ingelsson E, Schaefer EJ, Contois JH et al. Clinical Utility of Different Lipid Measures for Prediction of Coronary Heart Disease in Men and Women. *JAMA* 2007; **298(7)**:776-785.
27. Jeppesen J, Hansen TW, Rasmussen S, Ibsen H, Torp-Pedersen C, Madsbad S. Insulin resistance, the metabolic syndrome, and risk of incident cardiovascular disease: a population-based study. *J Am Coll Cardiol* 2007; **49(21)**:2112-9
28. Gerber Y, Dankner R, Chetrit A, Novikov I, Goldbourt U. The role of risk factor time trends in the steep decline of CHD mortality between two Israeli cohort studies. *Preventive Medicine* 2005; **41(1)**:85-91.
29. Rosengren A, Eriksson H, Larsson B et al. Secular changes in cardiovascular risk factors over 30 years in Swedish men aged 50: the study of men born in 1913, 1923, 1933 and 1943. *J Intern Med* 2000; **247(1)**:111-118.
30. Lapidus L, Andersson SW, Bengtsson C, Bjorkelund C, Rossander-Hulthen L, Lissner L. Weight and length at birth and their relationship to diabetes incidence and all-cause mortality--a 32-year follow-up of the population study of women in Gothenburg, Sweden. *Prim Care Diabetes* 2008; **2(3)**:127-133.
31. Cremer P, Nagel D, Mann H et al. Ten-year follow-up results from the Goettingen Risk, Incidence and Prevalence Study (GRIPS). I. Risk factors for myocardial infarction in a cohort of 5790 men. *Atherosclerosis* 1997; **129(2)**:221-230.
32. Salomaa VV, Strandberg TE, Vanhanen H, Naukkarinen V, Sarna S, Miettinen TA. Glucose tolerance and blood pressure: long term follow up in middle aged men. *BMJ*. 1991;**302(6775)**:493-6.
33. Lindroos M, Kupari M, Heikkila J, Tilvis R. Prevalence of aortic valve abnormalities in the elderly: an echocardiographic study of a random population sample. *J Am Coll Cardiol* 1993;**21(5)**:1220–5
34. Kiyohara Y, Shinohara A, Kato I, Shiota T, Kubo M, Tanizaki Y, Fujishima M, Iida M. Dietary factors and development of impaired glucose tolerance and diabetes in a general Japanese population: the hisayama study. *J Epidemiol*. 2003; **13(5)**:251-8.
35. The Honolulu Heart Program, An Epidemiologic Study of Coronary Heart Disease and Stroke. Harwood Academic Publishers; 1996.
36. Rijkkelijkhuizen JM, Nijpels G, Heine RJ, Bouter LM, Stehouwer CD, Dekker JM. High risk of cardiovascular mortality in individuals with impaired fasting glucose is explained by conversion to diabetes: the Hoorn study. *Diabetes Care* 2007; **30(2)**:332-336.
37. Rimm EB, Giovannucci EL, Willett WC, Colditz GA, Ascherio A, Rosner B, Stampfer MJ. Prospective study of alcohol consumption and risk of coronary disease in men. *Lancet*. 1991;**338(8765)**:464-8.
38. Iso H, Naito Y, Sato S et al. Serum triglycerides and risk of coronary heart disease among Japanese men and women. *Am J Epidemiol* 2001; **153(5)**:490-499.
39. Goldbourt U, Medalie JH. High density lipoprotein cholesterol and incidence of coronary heart disease—the Israeli Ischemic Heart Disease Study. *Am J Epidemiol* 1979;**109(3)**:296–308.
40. Lakka HM, Lakka TA, Tuomilehto J, Sivenius J, Salonen JT. Hyperinsulinemia and the risk of cardiovascular death and acute coronary and cerebrovascular events in men: the Kuopio Ischaemic Heart Disease Risk Factor Study. *Arch Intern Med* 2000; **160(8)**:1160–8.
41. Schalk BW, Visser M, Bremmer MA, Penninx BW, Bouter LM, Deeg DJ. Change of serum albumin and risk of cardiovascular disease and all-cause mortality: Longitudinal Aging Study Amsterdam. *Am J Epidemiol* 2006; **164(10)**:969-77.
42. Meade TW. Design and intermediate results of the Lower Extremity Arterial Disease Event Reduction (LEADER) trial of bezafibrate in men with lower extremity arterial disease. *Curr Control Trials Cardiovasc Med* 2001;**2(4)**:195–204.
43. Engstrom G, Stavenow L, Hedblad B, Lind P, Eriksson KF, Janzon L, et al. Inflammation-sensitive plasma proteins, diabetes, and mortality and incidence of myocardial infarction and stroke: a population-based study. *Diabetes* 2003; **52(2)**:442–7.

44. Hoeymans N, Smit HA, Verkleij H, Kromhout D. Cardiovascular risk factors in relation to educational level in 36 000 men and women in The Netherlands. *Eur Heart J.* 1996;**17(4)**:518-25.
45. Bild DE, Bluemke DA, Burke GL, Detrano R, Diez Roux AV, Folsom AR, Greenland P, Jacob DR Jr, Kronmal R, Liu K, Nelson JC, O'Leary D, Saad MF, Shea S, Szklo M, Tracy RP. Multi-ethnic study of atherosclerosis: objectives and design. *Am J Epidemiol.* 2002;**156(9)**:871-81.
46. The RIFLE Research Group. Presentation of the RIFLE project risk factors and life expectancy. *Eur J Epidemiol* 1993; **9(5)**:459-476.
47. Thorand B, Lowel H, Schneider A, Kolb H, Meisinger C, Frohlich M, et al. C-reactive protein as a predictor for incident diabetes mellitus among middle-aged men: results from the MONICA Augsburg cohort study, 1984–1998. *Arch Intern Med* 2003; **163(1)**:93–9.
48. Houterman S, Verschuren WM, Oomen CM, Boersma-Cobbaert CM, Kromhout D. Trends in total and high density lipoprotein cholesterol and their determinants in The Netherlands between 1993 and 1997. *Int J Epidemiol.* 2001;**30(5)**:1063-70.
49. Wilhelmsen L, Johansson S, Rosengren A, Wallin I, Dotevall A, Lappas G. Risk factors for cardiovascular disease during the period 1985-1995 in Goteborg, Sweden. The GOT-MONICA Project. *J Intern Med* 1997; **242(3)**:199-211.
50. Fletcher AE, Jones DA, Bulpitt CJ, Tulloch AJ. The MRC trial of assessment and management of older people in the community: objectives, design and interventions [ISRCTN23494848]. *BMC Health Serv Res.* 2002;**2(1)**:21
51. Eberly LE, Cohen JD, Prineas R, Yang L. Impact of incident diabetes and incident nonfatal cardiovascular disease on 18-year mortality: the multiple risk factor intervention trial experience. *Diabetes Care* 2003; **26(3)**:848-854.
52. Bjartveit K, Foss OP, Gjervig T. The cardiovascular disease study in Norwegian counties. Results from first screening. *Acta Med Scand Suppl* 1983; **675**:1-184.
53. Lipton RB, Liao Y, Cao G, Cooper RS, McGee D. Determinants of incident non-insulin-dependent diabetes mellitus among blacks and whites in a national sample. The NHANES I Epidemiologic Follow-up Study. *Am J Epidemiol.* 1993;**138(10)**:826-39.
54. Muntner P, He J, Chen J, Fonseca V, Whelton PK. Prevalence of non-traditional cardiovascular disease risk factors among persons with impaired fasting glucose, impaired glucose tolerance, diabetes, and the metabolic syndrome: analysis of the Third National Health and Nutrition Examination Survey (NHANES III). *Ann Epidemiol* 2004; **14(9)**:686-695.
55. Hu FB, Stampfer MJ, Solomon CG, Liu S, Willett WC, Speizer FE, Nathan DM, Manson JE. The impact of diabetes mellitus on mortality from all causes and coronary heart disease in women: 20 years of follow-up. *Arch Intern Med.* 2001;**161(14)**:1717-23.
56. Vartiainen E, Puska P, Jousilahti P, Korhonen HJ, Tuomilehto J, Nissinen A. Twenty-year trends in coronary risk factors in north Karelia and in other areas of Finland. *Int J Epidemiol* 1994; **23(3)**:495-504.
57. Cooper JA, Miller GJ, Humphries SE. A comparison of the PROCAM and Framingham point-scoring systems for estimation of individual risk of coronary heart disease in the Second Northwick Park Heart Study. *Atherosclerosis* 2005; **181(1)**:93-100.
58. MacLean DR, Petrasovits A, Nargundkar M, Connelly PW, MacLeod E, Edwards A, Hessel P. Canadian heart health surveys: a profile of cardiovascular risk. Survey methods and data analysis. Canadian Heart Health Surveys Research Group. *CMAJ.*1992;**146(11)**:1969-74.
59. Kitamura A, Sato S, Kiyama M et al. Trends in the incidence of coronary heart disease and stroke and their risk factors in Japan, 1964 to 2003: the Akita-Osaka study. *J Am Coll Cardiol* 2008; **52(1)**:71-79.
60. Haheim LL, Holme I, Hjermann I, Leren P, Tonstad S. Trends in the incidence of acute myocardial infarction and stroke: a 21-year follow-up of the Oslo study. *Scand Cardiovasc J* 2004; **38(4)**:216-221.
61. Balkau B, Shipley M, Jarrett RJ et al. High blood glucose concentration is a risk factor for mortality in middle-aged nondiabetic men. 20-year follow-up in the Whitehall Study, the Paris Prospective Study, and the Helsinki Policemen Study. *Diabetes Care* 1998; **21(3)**:360-367.

62. Geluk CA, Tio RA, Tijssen JG, van Dijk RB, Dijk WA, Hillege HL, de Jong PE, van Gilst WH, Zijlstra F. Clinical characteristics, cardiac events and coronary angiographic findings in the prospective PREVEND cohort: an observational study. *Neth Heart J* 2007; **15(4)**:133-41
63. Garcia-Palmieri MR, Feliberti M, Costas R, Jr., Colon AA, Cruz-Vidal M, Cortes-Alicea M, et al. An epidemiological study on coronary heart disease in Puerto Rico. The Puerto Rico Heart Health Program. 1969. *Bol Asoc Med P R* 2002;**94(1-12)**:61-7.
64. Ducimetiere P, Ruidavets JB, Montaye M, Haas B, Yarnell J. Five-year incidence of angina pectoris and other forms of coronary heart disease in healthy men aged 50-59 in France and Northern Ireland: the Prospective Epidemiological Study of Myocardial Infarction (PRIME) Study. *Int J Epidemiol* 2001;**30(5)**:1057-62.
65. Assmann G, Cullen P, Schulte H. Simple scoring scheme for calculating the risk of acute coronary events based on the 10-year follow-up of the prospective cardiovascular Munster (PROCAM) study. *Circulation* 2002;**105(3)**:310-5.
66. Shepherd J, Blauw GJ, Murphy MB, Cobbe SM, Bollen EL, Buckley BM, et al. The design of a prospective study of Pravastatin in the Elderly at Risk (PROSPER). PROSPER Study Group. PROspective Study of Pravastatin in the Elderly at Risk. *Am J Cardiol* 1999;**84(10)**:1192-7.
67. Cantin B, Despres JP, Lamarche B, Moorjani S, Lupien PJ, Bogaty P, et al. Association of fibrinogen and lipoprotein(a) as a coronary heart disease risk factor in men (The Quebec Cardiovascular Study). *Am J Cardiol* 2002;**89(6)**:662-6.
68. Wingard DL, Barrett-Connor EL, Scheidt-Nave C, McPhillips JB. Prevalence of cardiovascular and renal complications in older adults with normal or impaired glucose tolerance or NIDDM. A population-based study. *Diabetes Care* 1993;**16(7)**:1022-5.
69. Jonsdottir LS, Sigfusson N, Gudnason V, Sigvaldason H, Thorgeirsson G. Do lipids, blood pressure, diabetes, and smoking confer equal risk of myocardial infarction in women as in men? The Reykjavik Study. *J Cardiovasc Risk* 2002; **9(2)**:67-76.
70. Kardys I, Kors JA, van der Meer I, Hofman A, van der Kuip DA, Witteman JC. Spatial QRS-T angle predicts cardiac death in a general population. *Eur Heart J* 2003;**24(14)**:1357-64.
71. Woodward M, Brindle P, Tunstall-Pedoe H, for the SIGN group on risk estimation\*. Adding social deprivation and family history to cardiovascular risk assessment: the ASSIGN score from the Scottish Heart Health Extended Cohort (SHHEC). *Heart* 2007; **93(2)**:172-176.
72. Howard BV, Welty TK, Fabsitz RR et al. Risk factors for coronary heart disease in diabetic and nondiabetic Native Americans. The Strong Heart Study. *Diabetes* 1992; **41 Suppl 2**:4-11.:4-11.
73. Onat A. Risk factors and cardiovascular disease in Turkey. *Atherosclerosis* 2001;**156(1)**:1-10.
74. Miller NE, Thelle DS, Forde OH, Mjos OD. The Tromso heart-study. High-density lipoprotein and coronary heart-disease: a prospective case-control study. *Lancet* 1977; **1(8019)**:965-968.
75. Lind L, Vessby B, Sundstrom J. The Apolipoprotein B/AI Ratio and the Metabolic Syndrome Independently Predict Risk for Myocardial Infarction in Middle-Aged Men. *Arterioscler Thromb Vasc Biol* 2006; **26(2)**:406-410.
76. Steering Committee of the Physicians' Health Study Research Group. Final report on the aspirin component of the ongoing Physicians' Health Study. *N Engl J Med* 1989;**321(3)**:129-35.
77. Ulmer H, Kelleher C, Diem G, Concin H. Long-term tracking of cardiovascular risk factors among men and women in a large population-based health system: the Vorarlberg Health Monitoring & Promotion Programme. *Eur Heart J* 2003;**24(11)**: 1004-13.
78. Rodeghiero F, Tosetto A. The VITA Project: population-based distributions of protein C, antithrombin III, heparin-cofactor II and plasminogen—relationship with physiological variables and establishment of reference ranges. *Thromb Haemost* 1996; **76(2)**:226-33.
79. Wassertheil-Smoller S, Kooperberg C, McGinn AP, Kaplan RC, Hsia J, Hendrix SL, Manson JE, Berger JS, Kuller LH, Allison MA, Baird AE. Lipoprotein-associated phospholipase A2, hormone use, and the risk of ischemic stroke in postmenopausal women. *Hypertension* 2008; **51(4)**:1115-22
80. Singh-Manoux A, Gimeno D, Kivimaki M, Brunner E, Marmot MG. Low HDL cholesterol is a risk factor for deficit and decline in memory in midlife: the Whitehall II study. *Arterioscler Thromb Vasc Biol* 2008; **28(8)**:1556-1562.

81. Ridker PM, Rifai N, Cook NR, Bradwin G, Buring JE. Non-HDL Cholesterol, Apolipoproteins A-I and B100, Standard Lipid Measures, Lipid Ratios, and CRP as Risk Factors for Cardiovascular Disease in Women. *JAMA* 2005; **294**(3):326-333.
82. West of Scotland Coronary Prevention Study Group. Influence of pravastatin and plasma lipids on clinical events in the West of Scotland Coronary Prevention Study (WOSCOPS). *Circulation* 1998; **97**(15):1440-1445.
83. Marin A, Medrano MJ, Gonzalez J et al. Risk of ischaemic heart disease and acute myocardial infarction in a Spanish population: observational prospective study in a primary-care setting. *BMC Public Health* 2006; **6**:38.
84. Weijenberg MP, Feskens EJM, Kromhout D. Total and High Density Lipoprotein Cholesterol as Risk Factors for Coronary Heart Disease in Elderly Men during 5 Years of Follow-up: The Zutphen Elderly Study. *Am J Epidemiol* 1996; **143**(2):151-158.
